# Supplementary material for: Metal centers and aromatic moieties in Schiff base complexes: impact on G-quadruplex stabilization and oncogene downregulation
Source: Royal Society of Chemistry journal article supplement (doi:10.1039/d4qi01394h), 2024-01-01
Supplement: d4qi01394h1.pdf [file d4qi01394h1.pdf]

## Electronic Supplementary Information

### **Metal Center and Aromatic Moiety in Schiff Base Complexes: Impact on G-Quadruplex Stabilization and Oncogene Downregulation.**

Aurane Froux,<sup>a,b</sup> Luisa D'Anna,<sup>a</sup> Aurianne Rainot,<sup>a,c</sup> Camille Neybecker,<sup>b</sup> Angelo Spinello,<sup>a</sup> Riccardo Bonsignore,<sup>a</sup> Raphaël Rouget,<sup>b</sup> Guillaume Harlé,<sup>b</sup> Alessio Terenzi,<sup>a</sup> Antonio Monari,<sup>c</sup> Stéphanie Grandemange,<sup>b,\*</sup> and Giampaolo Barone,<sup>a,\*</sup>

---

*a* Università di Palermo, Department of Biological, Chemical and Pharmaceutical Sciences and Technologies, Viale delle Scienze, Edificio 17, 90128 Palermo, Italy

*b* Université de Lorraine and CNRS, UMR 7039 CRAN, F-54000 Nancy, France

*c* Université Paris Cité and CNRS, ITODYS, F-75006 Paris, France

**Figure S1.** Structures of the complexes synthesized in this study.

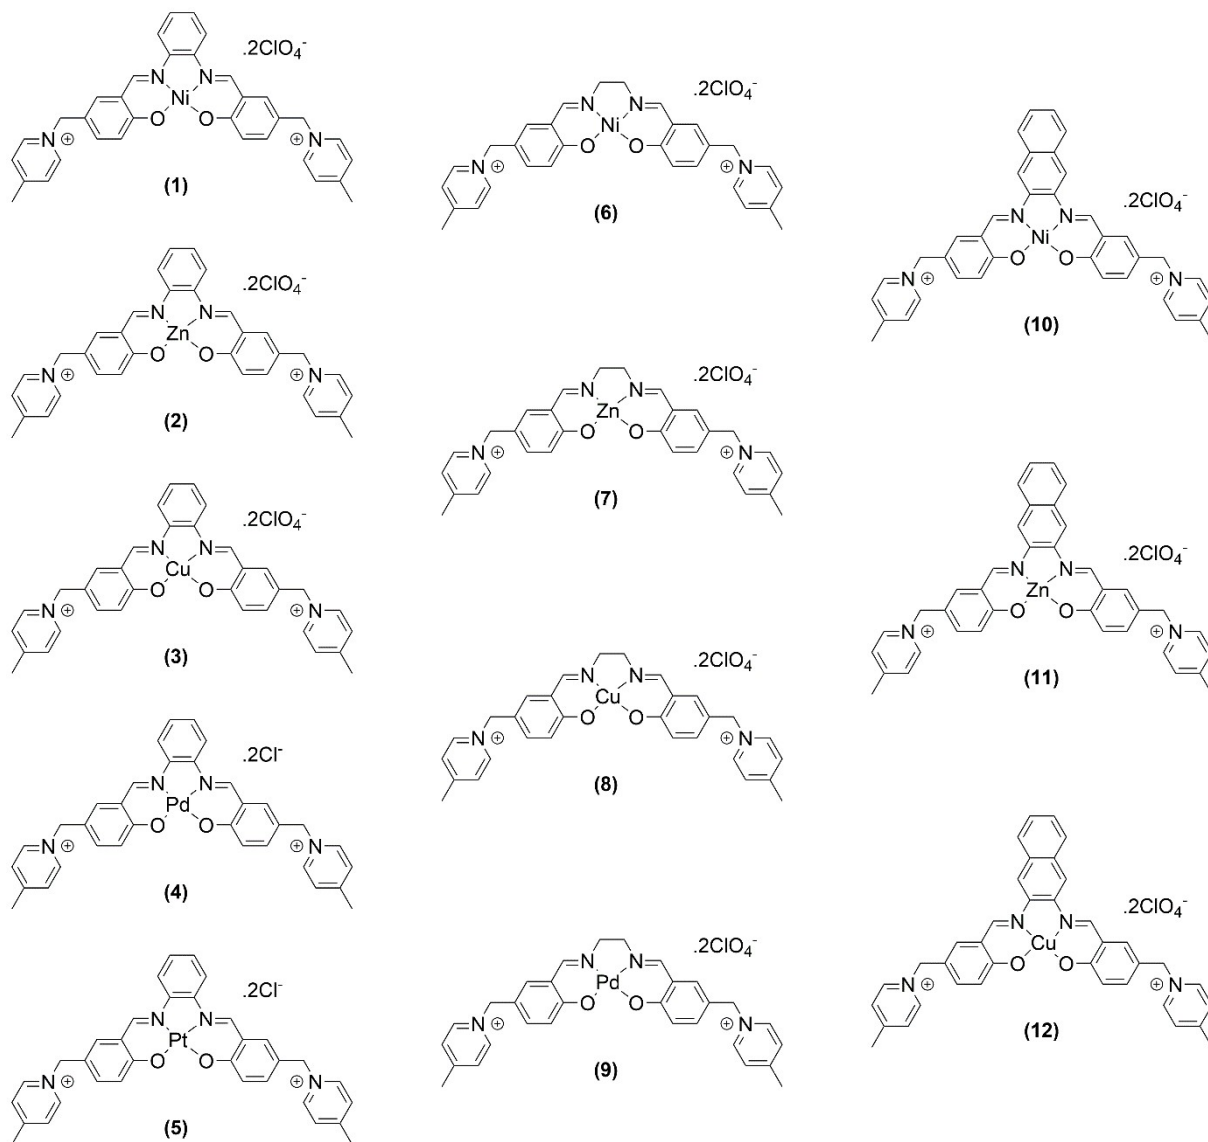

**Figure S2.**  $^1\text{H}$ -NMR spectra of the new pyridinium **(B)** and metal complexes **1**, **2**, **4**, **5**, **6**, **7**, **8**, **10** and **11** in  $d_6$ -DMSO.

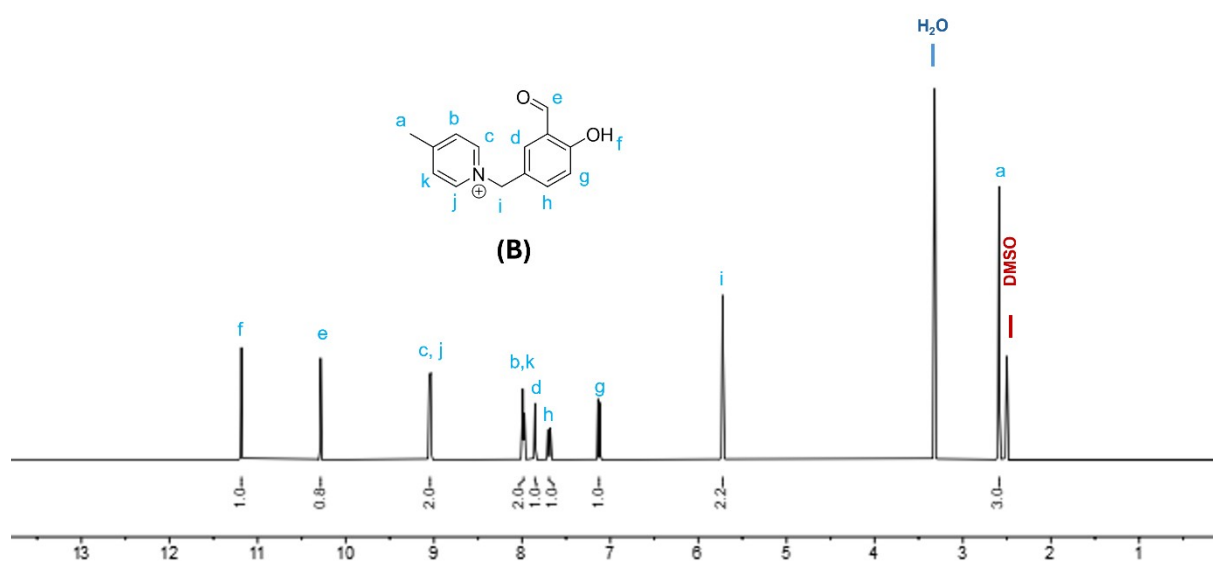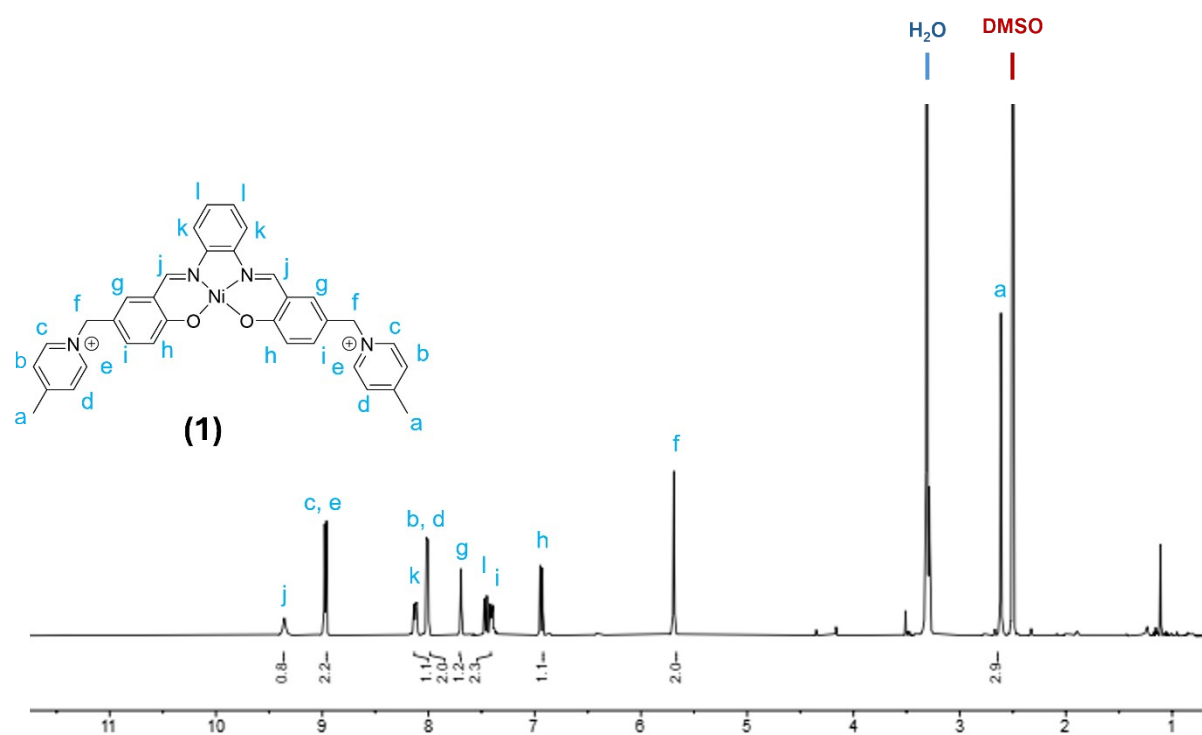

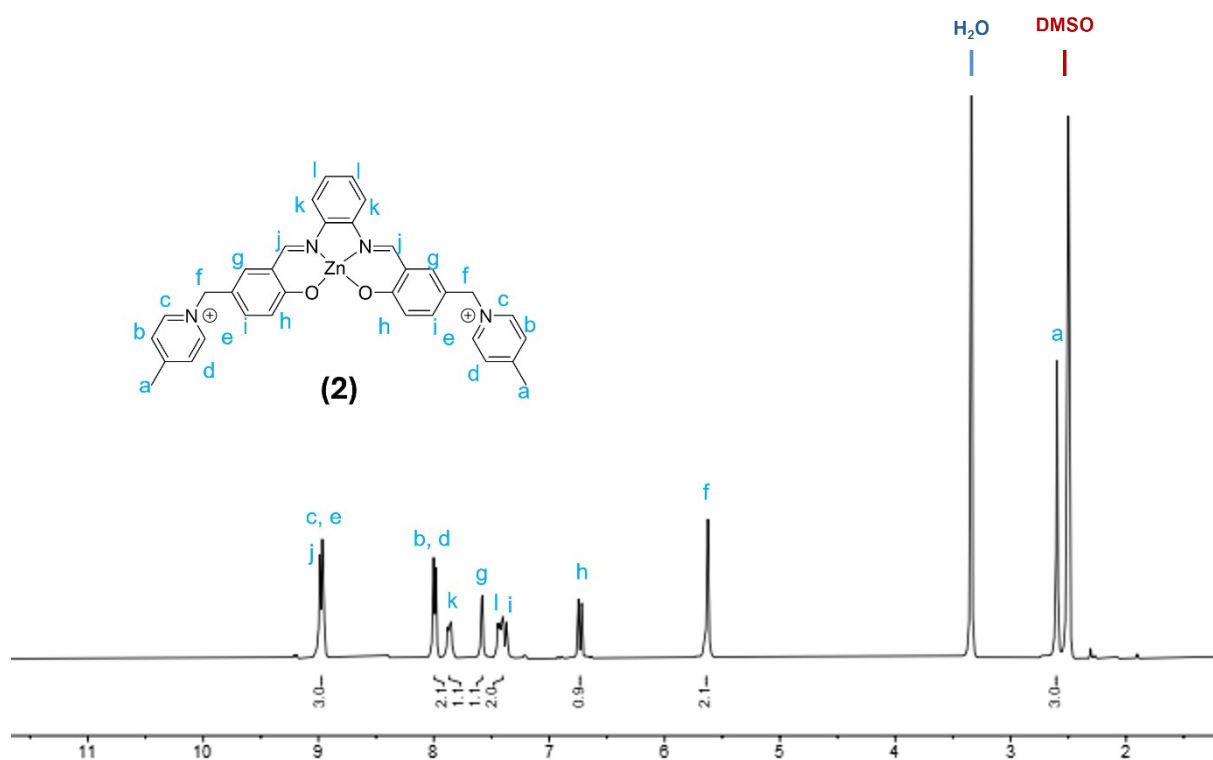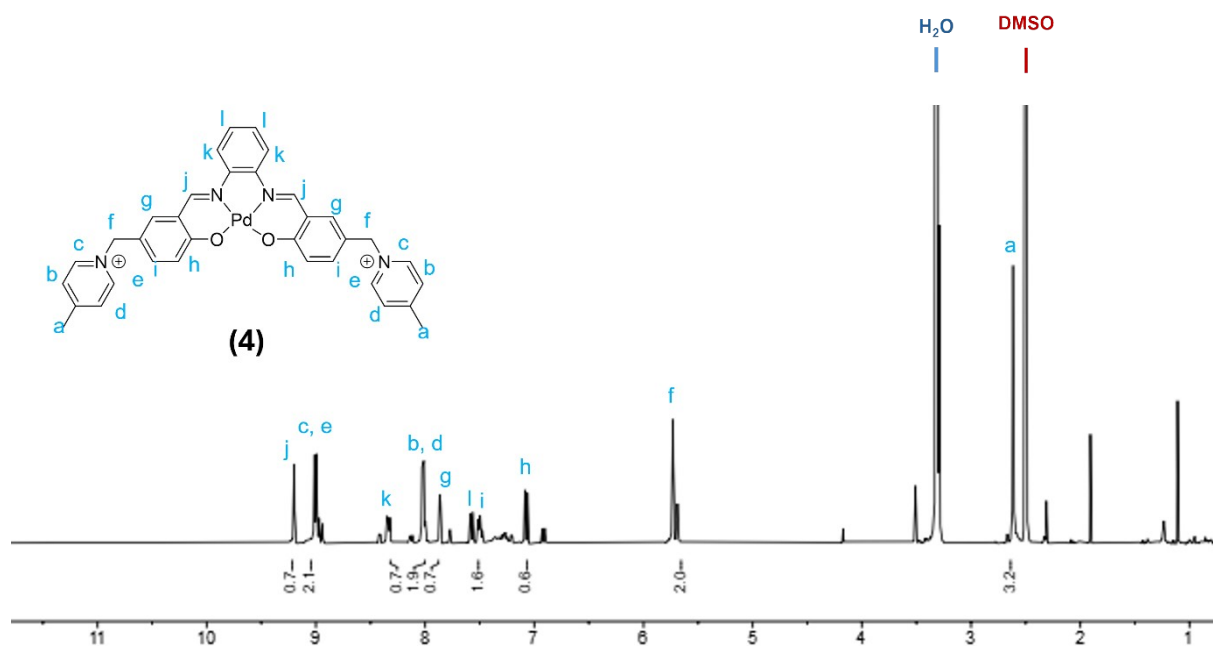

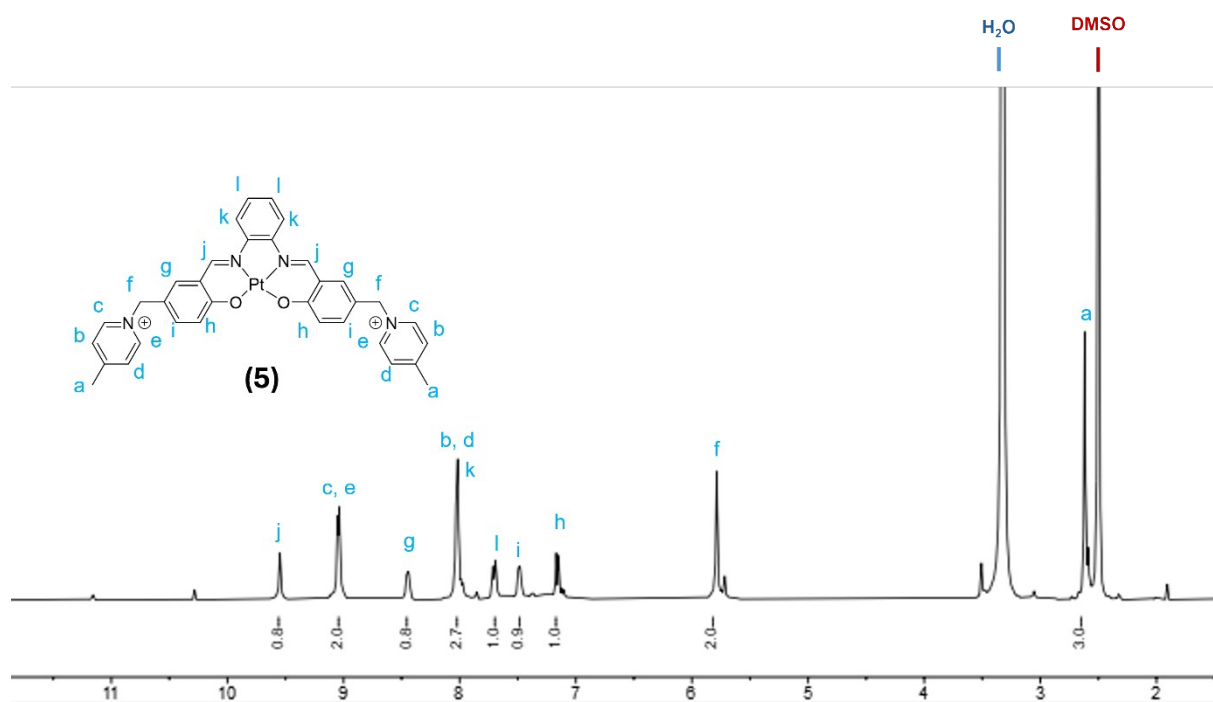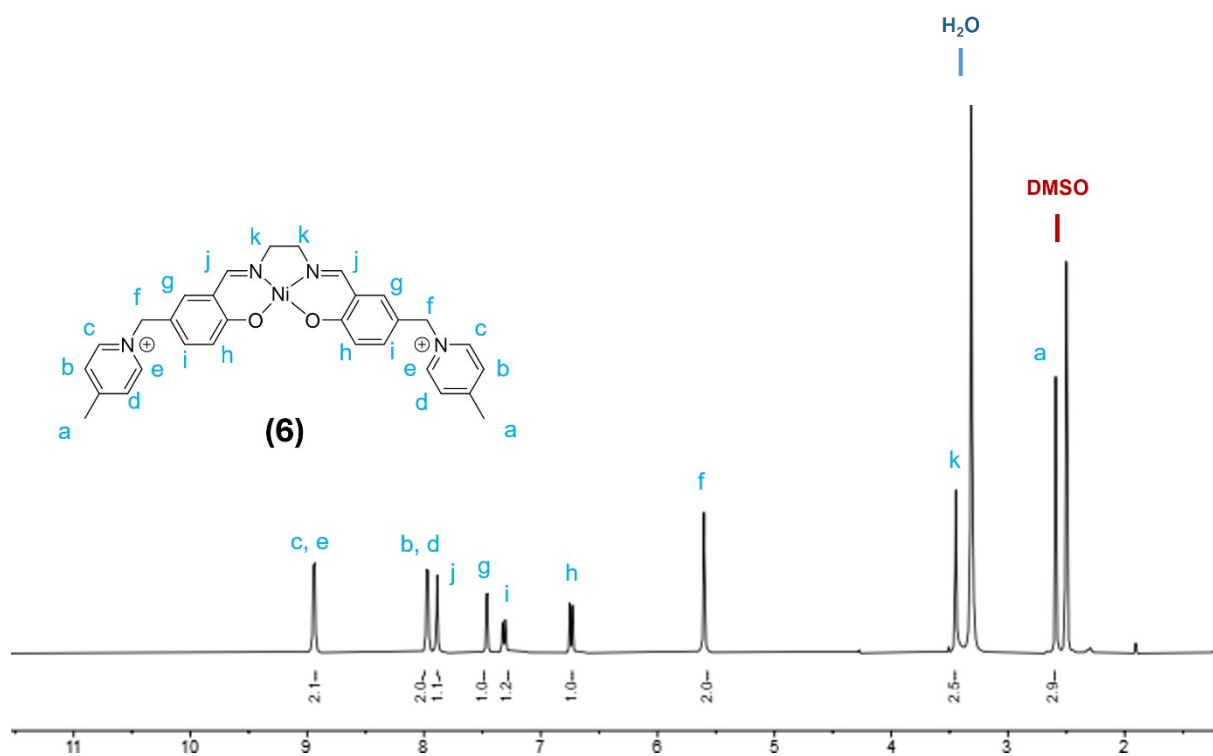

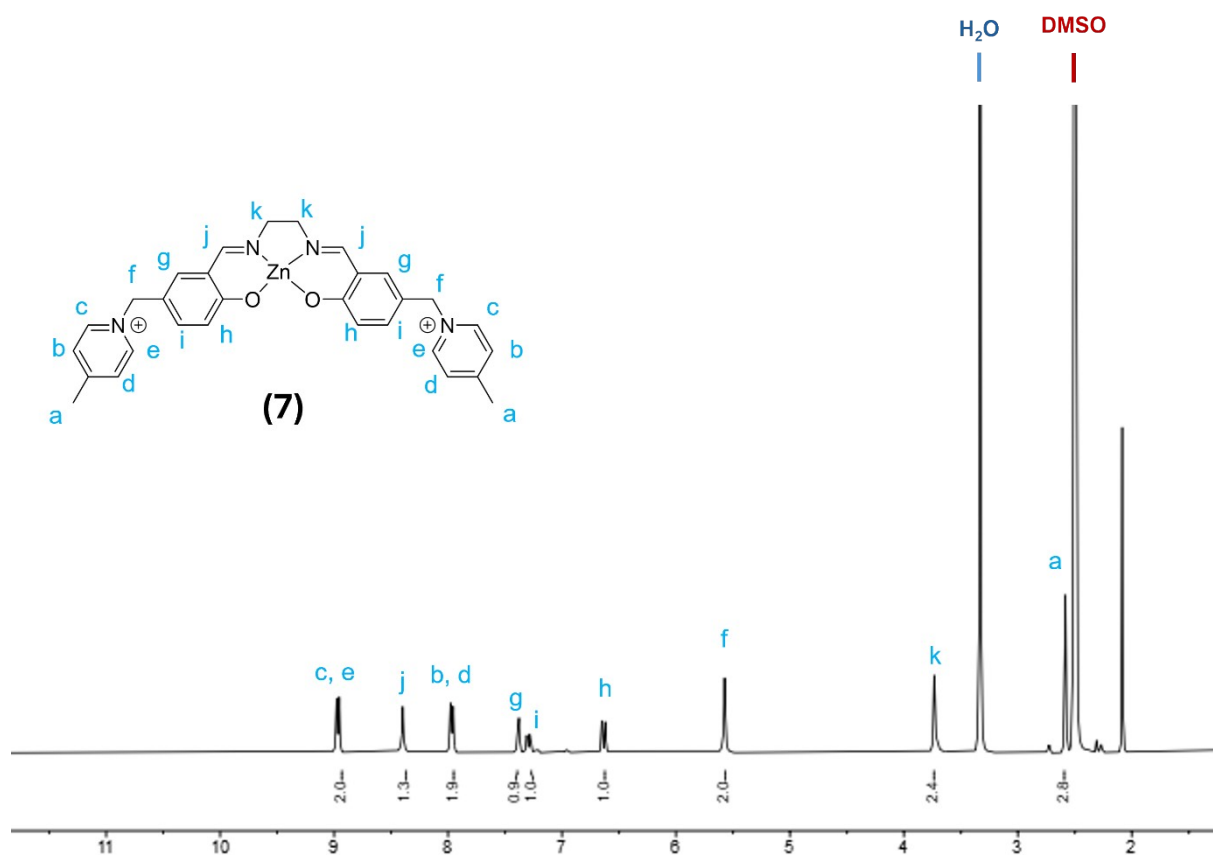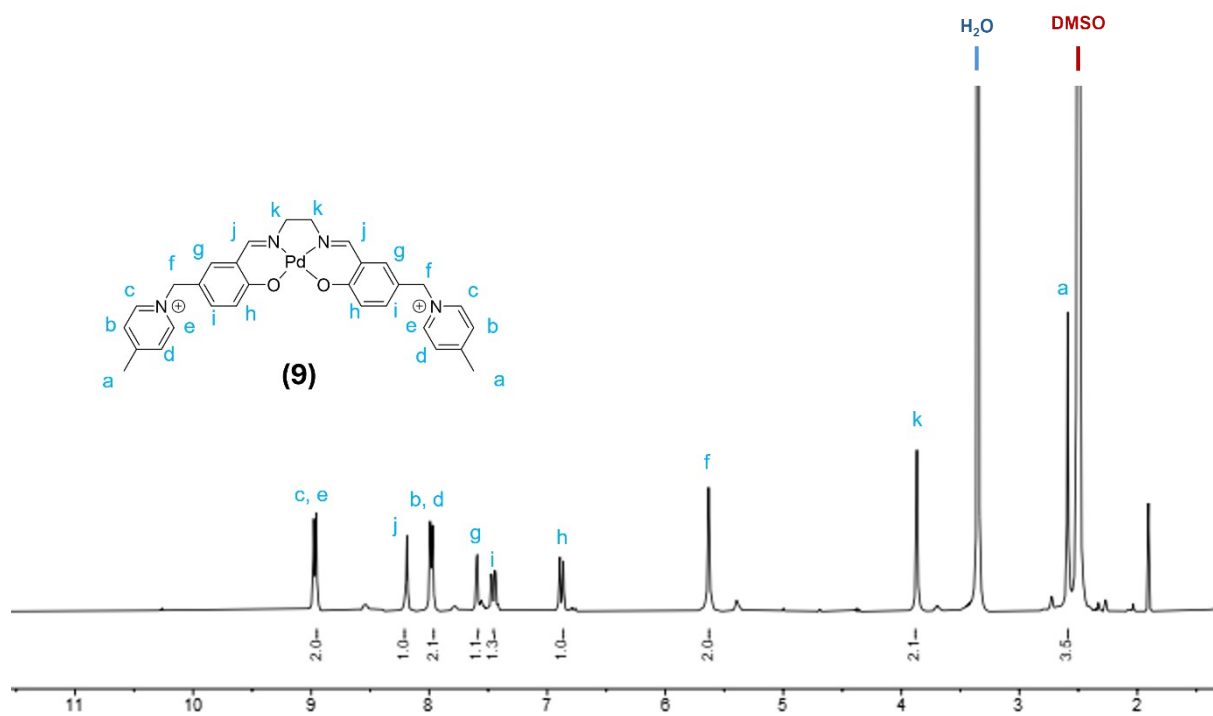

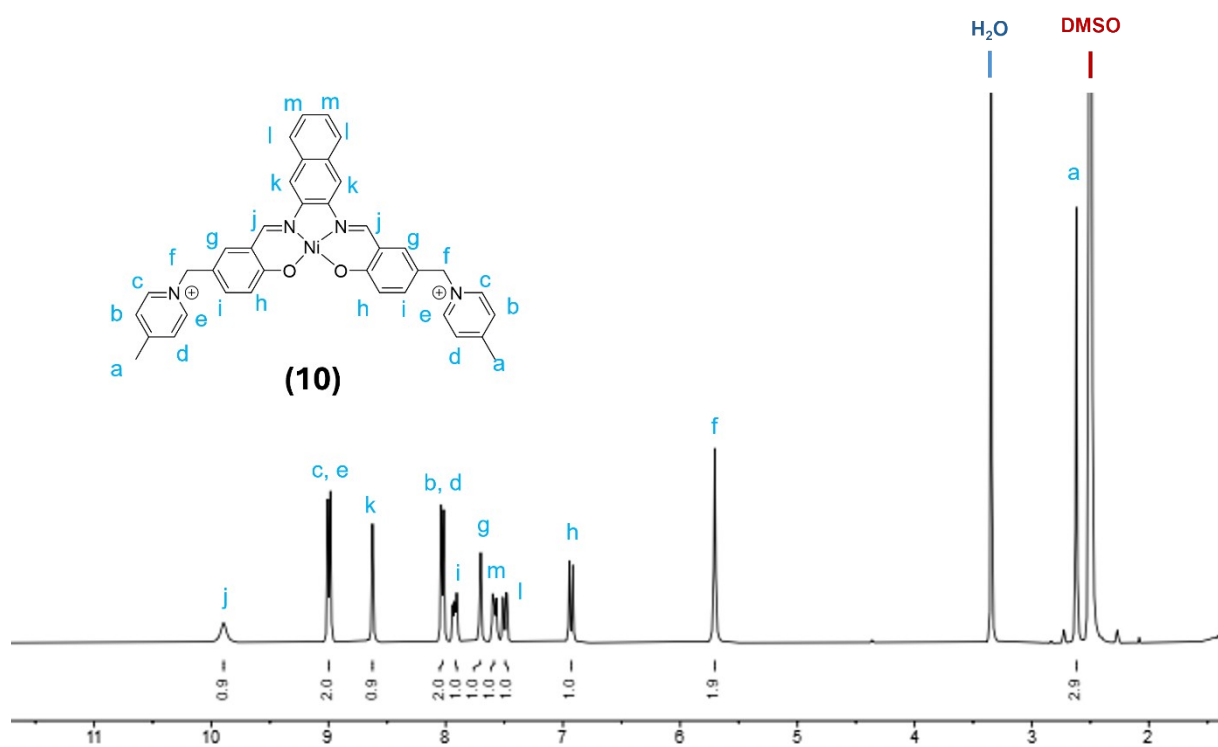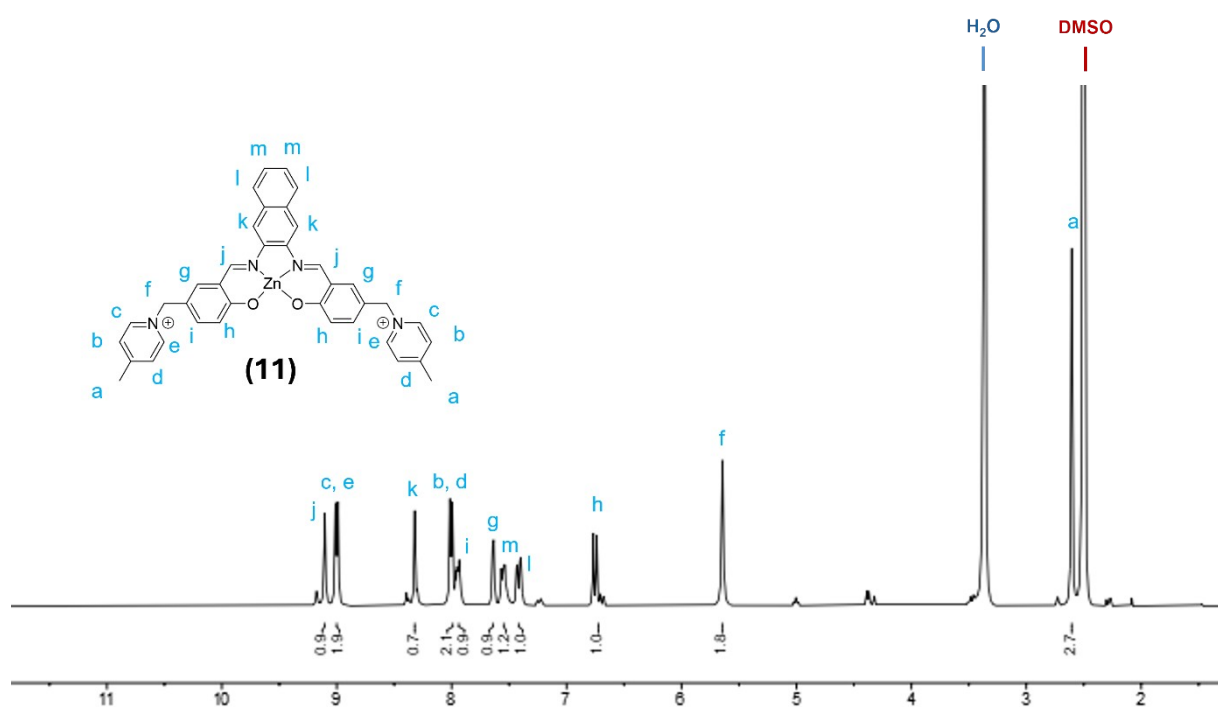

**Figure S3.** Mass spectra of compound **B** and metal complexes **1-12**. In each figure, calculated values (table), theoretical spectrum (left) and experimental spectrum (right) are reported.

Compound **B**

Calculated for  $C_{14}H_{14}NO_2$   $[2M + Cl]^+$  491.17; found 491.17

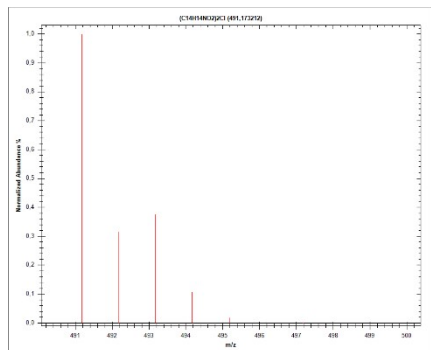

Calculated

| m/z    | Abund<br>(% largest) | Abund<br>(% sum) | Abund<br>(% first) |
|--------|----------------------|------------------|--------------------|
| 491.17 | 100                  | 54.93            | 100                |
| 492.18 | 31.49                | 17.3             | 31.49              |
| 493.17 | 37.61                | 20.66            | 37.61              |
| 494.17 | 10.8                 | 5.93             | 10.8               |
| 495.18 | 1.87                 | 1.03             | 1.87               |
| 496.18 | 0.24                 | 0.13             | 0.24               |
| 497.18 | 0.02                 | 0.01             | 0.02               |

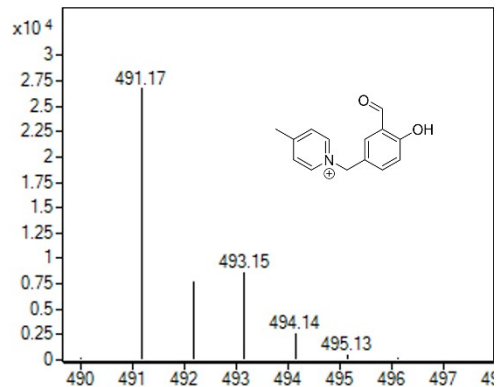

Found

## Compound 1

Calculated for  $(C_{34}H_{30}N_4O_2Ni)_2(ClO_4)_2 [M]^{2+}$  684.12; found 684.12

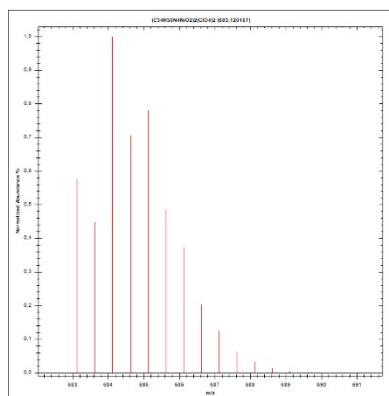

Calculated

| m/z    | Abund<br>(% largest) | Abund<br>(% sum) | Abund<br>(% first) |
|--------|----------------------|------------------|--------------------|
| 683.12 | 57.73                | 11.99            | 100                |
| 683.62 | 44.81                | 9.31             | 77.62              |
| 684.12 | 100                  | 20.77            | 173.22             |
| 684.62 | 70.55                | 14.65            | 122.21             |
| 685.12 | 78.05                | 16.21            | 135.19             |
| 685.62 | 48.6                 | 10.09            | 84.19              |
| 686.12 | 37.26                | 7.74             | 64.53              |
| 686.62 | 20.34                | 4.22             | 35.22              |
| 687.12 | 12.5                 | 2.6              | 21.65              |
| 687.62 | 6.09                 | 1.27             | 10.55              |
| 688.12 | 3.16                 | 0.66             | 5.48               |
| 688.62 | 1.39                 | 0.29             | 2.41               |
| 689.12 | 0.62                 | 0.13             | 1.07               |
| 689.62 | 0.24                 | 0.05             | 0.42               |
| 690.12 | 0.09                 | 0.02             | 0.16               |
| 690.62 | 0.03                 | 0.01             | 0.05               |

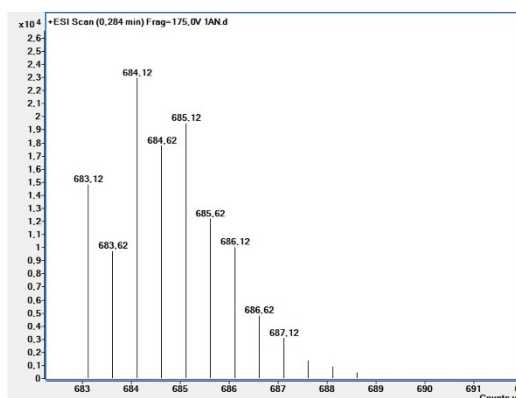

Found

## Compound 1

Calculated for  $C_{22}H_{16}N_2NiO_2 [M]^{2+}$  199.03; found 199.03

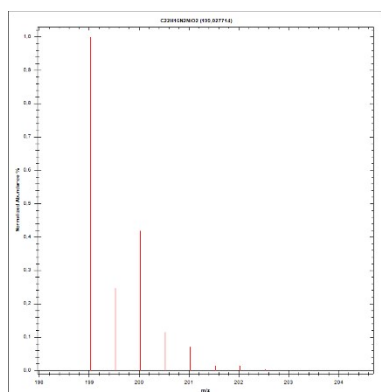

| m/z    | Abund<br>(% largest) | Abund<br>(% sum) | Abund<br>(% first) |
|--------|----------------------|------------------|--------------------|
| 199.03 | 100                  | 52.98            | 100                |
| 199.53 | 24.79                | 13.13            | 24.79              |
| 200.03 | 41.87                | 22.19            | 41.87              |
| 200.53 | 11.55                | 6.12             | 11.55              |
| 201.03 | 7.07                 | 3.75             | 7.07               |
| 201.53 | 1.51                 | 0.8              | 1.51               |
| 202.02 | 1.55                 | 0.82             | 1.55               |
| 202.53 | 0.36                 | 0.19             | 0.36               |
| 203.03 | 0.05                 | 0.02             | 0.05               |
| 203.53 | 0                    | 0                | 0                  |

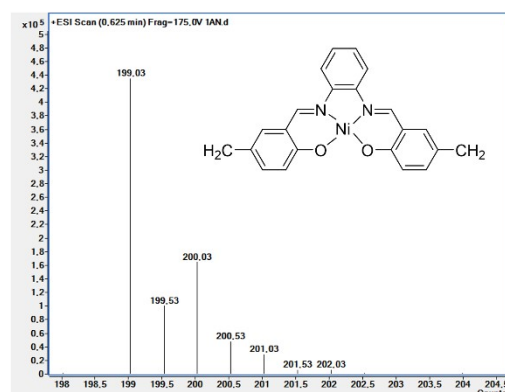

Calculated for  $C_6H_7N [M + H]^+$  94.07; found 94.07

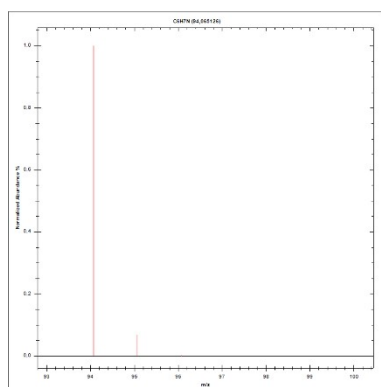

Calculated

| m/z   | Abund<br>(% largest) | Abund<br>(% sum) | Abund<br>(% first) |
|-------|----------------------|------------------|--------------------|
| 94.07 | 100                  | 93.32            | 100                |
| 95.07 | 6.95                 | 6.48             | 6.95               |
| 96.07 | 0.21                 | 0.19             | 0.21               |
| 97.07 | 0                    | 0                | 0                  |

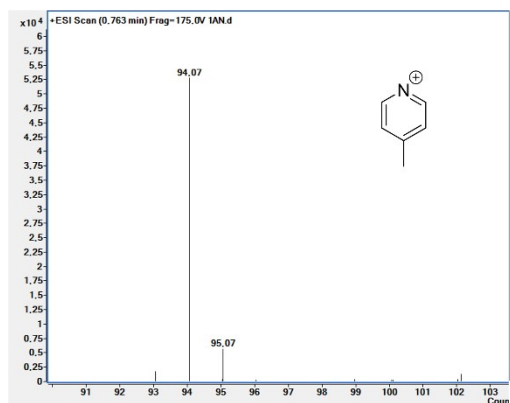

Found

## Compound 2

Calculated for  $(C_{34}H_{30}N_4O_2Zn)_2(ClO_4)_2 [M]^{2+}$  691.11; found 691.11

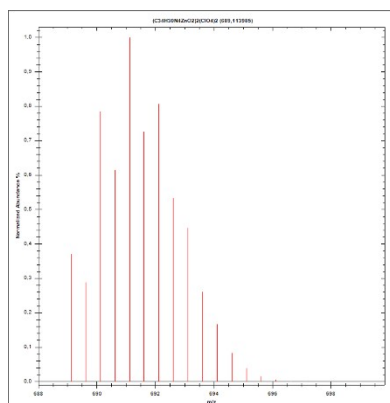

| m/z    | Abund<br>(% largest) | Abund<br>(% sum) | Abund<br>(% first) |
|--------|----------------------|------------------|--------------------|
| 689.11 | 37.03                | 6.03             | 100                |
| 689.62 | 28.74                | 4.68             | 77.62              |
| 690.11 | 78.53                | 12.78            | 212.09             |
| 690.61 | 61.47                | 10.01            | 166.03             |
| 691.11 | 100                  | 16.28            | 270.08             |
| 691.61 | 72.68                | 11.83            | 196.29             |
| 692.11 | 80.64                | 13.13            | 217.8              |
| 692.61 | 53.36                | 8.69             | 144.12             |
| 693.11 | 44.62                | 7.26             | 120.5              |
| 693.61 | 26.12                | 4.25             | 70.54              |
| 694.11 | 16.66                | 2.71             | 45                 |
| 694.61 | 8.25                 | 1.34             | 22.29              |
| 695.11 | 3.88                 | 0.63             | 10.49              |
| 695.61 | 1.54                 | 0.25             | 4.15               |
| 696.11 | 0.53                 | 0.09             | 1.42               |
| 696.61 | 0.16                 | 0.03             | 0.42               |
| 697.11 | 0.04                 | 0.01             | 0.11               |

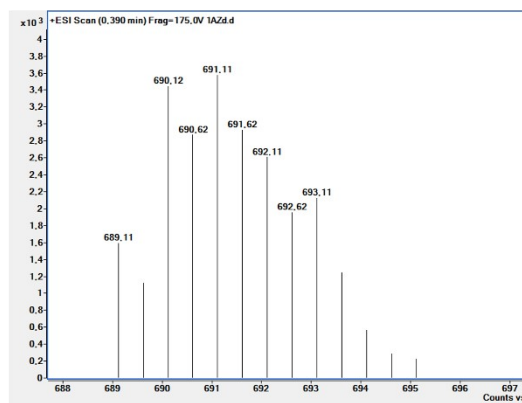

Calculated

Found

## Compound 2

Calculated for  $C_{22}H_{16}N_2ZnO_2 [M]^{2+}$  202.02; found 202.02

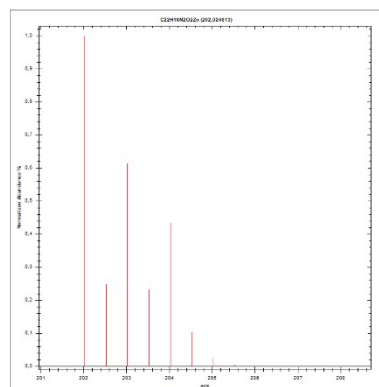

| m/z    | Abund<br>(% largest) | Abund<br>(% sum) | Abund<br>(% first) |
|--------|----------------------|------------------|--------------------|
| 202.02 | 100                  | 37.57            | 100                |
| 202.53 | 24.79                | 9.31             | 24.79              |
| 203.02 | 61.31                | 23.03            | 61.31              |
| 203.52 | 23.19                | 8.71             | 23.19              |
| 204.02 | 43.49                | 16.34            | 43.49              |
| 204.52 | 10.24                | 3.85             | 10.24              |
| 205.02 | 2.67                 | 1                | 2.67               |
| 205.53 | 0.45                 | 0.17             | 0.45               |
| 206.03 | 0.05                 | 0.02             | 0.05               |

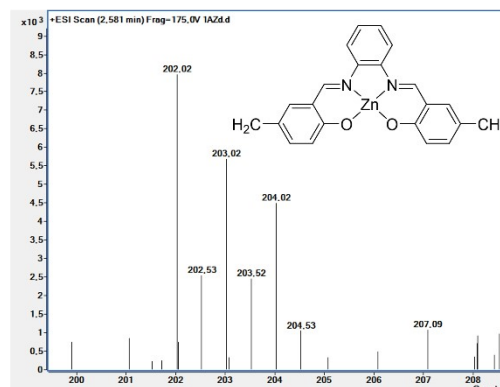

Calculated for  $C_6H_7N [M + H]^+$  94.07; found 94.07

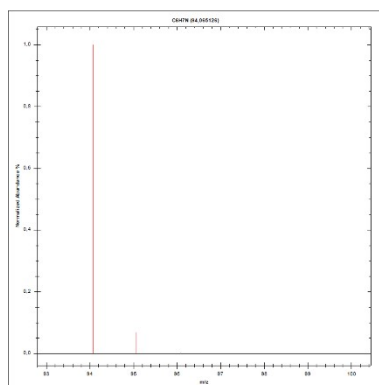

| m/z   | Abund<br>(% largest) | Abund<br>(% sum) | Abund<br>(% first) |
|-------|----------------------|------------------|--------------------|
| 94.07 | 100                  | 93.32            | 100                |
| 95.07 | 6.95                 | 6.48             | 6.95               |
| 96.07 | 0.21                 | 0.19             | 0.21               |
| 97.07 | 0                    | 0                | 0                  |

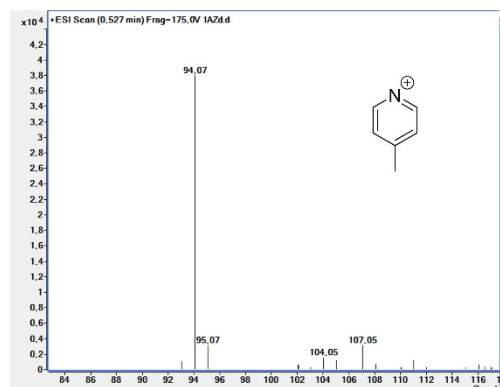

Calculated

Found

### Compound 3

Calculated for  $(C_{34}H_{30}N_4O_2Cu)_2(ClO_4)_2 [M]^{2+}$  689.11; found 689.12

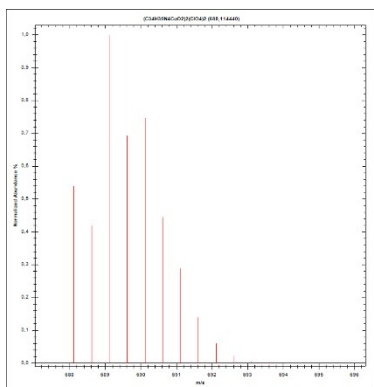

Calculated

| m/z    | Abund<br>(% largest) | Abund<br>(% sum) | Abund<br>(% first) |
|--------|----------------------|------------------|--------------------|
| 688.11 | 53.94                | 12.37            | 100                |
| 688.62 | 41.86                | 9.6              | 77.62              |
| 689.11 | 100                  | 22.94            | 185.4              |
| 689.62 | 69.21                | 15.88            | 128.32             |
| 690.11 | 74.81                | 17.16            | 138.7              |
| 690.61 | 44.51                | 10.21            | 82.52              |
| 691.11 | 28.76                | 6.6              | 53.32              |
| 691.61 | 13.92                | 3.19             | 25.81              |
| 692.11 | 5.97                 | 1.37             | 11.06              |
| 692.61 | 2.16                 | 0.5              | 4.01               |
| 693.11 | 0.64                 | 0.15             | 1.19               |
| 693.62 | 0.16                 | 0.04             | 0.29               |
| 694.12 | 0.03                 | 0.01             | 0.06               |
| 694.62 | 0.01                 | 0                | 0.01               |

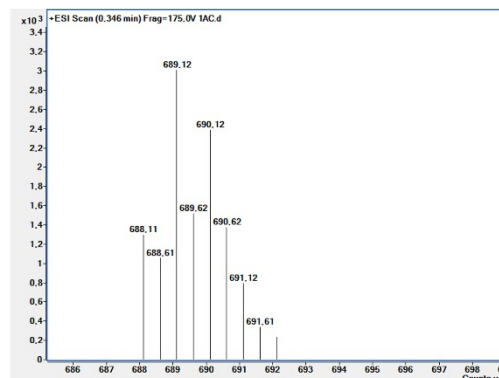

Found

### Compound 3

Calculated for  $C_{22}H_{16}N_2CuO_2 [M]^{2+}$  201.52; found 201.53

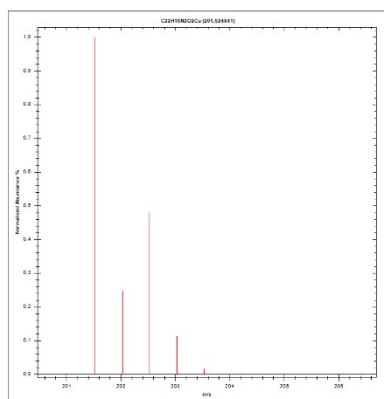

| m/z    | Abund<br>(% largest) | Abund<br>(% sum) | Abund<br>(% first) |
|--------|----------------------|------------------|--------------------|
| 201.52 | 100                  | 53.82            | 100                |
| 202.03 | 24.79                | 13.34            | 24.79              |
| 202.52 | 47.97                | 25.81            | 47.97              |
| 203.03 | 11.38                | 6.13             | 11.38              |
| 203.53 | 1.52                 | 0.82             | 1.52               |
| 204.03 | 0.15                 | 0.08             | 0.15               |
| 204.53 | 0.01                 | 0.01             | 0.01               |
| 205.03 | 0                    | 0                | 0                  |
| 205.53 | 0                    | 0                | 0                  |

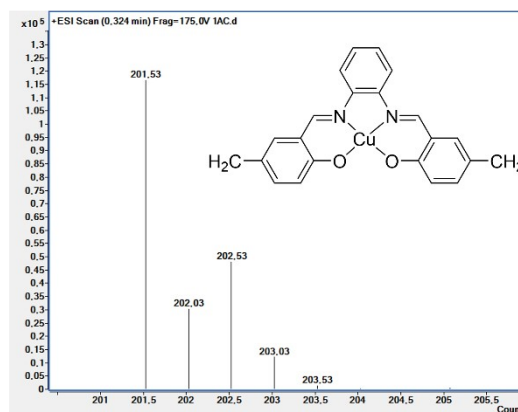

Calculated for  $C_6H_7N [M + H]^+$  94.07; found 94.07

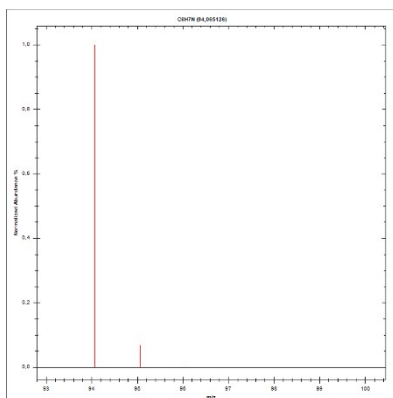

Calculated

| m/z   | Abund<br>(% largest) | Abund<br>(% sum) | Abund<br>(% first) |
|-------|----------------------|------------------|--------------------|
| 94.07 | 100                  | 93.32            | 100                |
| 95.07 | 6.95                 | 6.48             | 6.95               |
| 96.07 | 0.21                 | 0.19             | 0.21               |
| 97.07 | 0                    | 0                | 0                  |

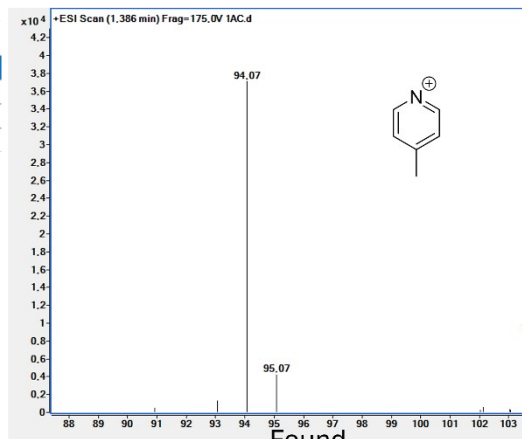

Found

# Compound 4

Calculated for  $(C_{34}H_{30}N_4O_2Pd)_2(ClO_4)_2 [M]^{2+}$  732.09; found 732.09

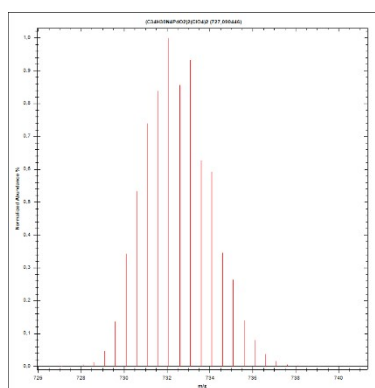

Calculated

| m/z    | Abund<br>(% largest) | Abund<br>(% sum) | Abund<br>(% first) |
|--------|----------------------|------------------|--------------------|
| 727.09 | 0.02                 | 0                | 100                |
| 727.59 | 0.02                 | 0                | 77.62              |
| 728.09 | 0.46                 | 0.06             | 2280.49            |
| 728.59 | 1.25                 | 0.17             | 6132.89            |
| 729.09 | 4.64                 | 0.61             | 22819.06           |
| 729.59 | 13.57                | 1.8              | 66752.4            |
| 730.09 | 34.29                | 4.54             | 168694.72          |
| 730.59 | 53.25                | 7.05             | 261929.45          |
| 731.09 | 73.97                | 9.79             | 363863.41          |
| 731.59 | 83.83                | 11.1             | 412332.06          |
| 732.09 | 100                  | 13.24            | 491694.66          |
| 732.59 | 85.67                | 11.34            | 421389.09          |
| 733.09 | 93.26                | 12.35            | 458759.66          |
| 733.59 | 62.75                | 8.31             | 308670.97          |
| 734.09 | 59.3                 | 7.85             | 291692.22          |
| 734.59 | 34.55                | 4.57             | 169930.06          |
| 735.09 | 26.4                 | 3.5              | 129869.48          |
| 735.59 | 13.98                | 1.85             | 68760.91           |
| 736.09 | 8.05                 | 1.07             | 39593.71           |
| 736.59 | 3.7                  | 0.49             | 18178.14           |
| 737.09 | 1.54                 | 0.2              | 7961.02            |
| 737.59 | 0.55                 | 0.07             | 2701.35            |
| 738.09 | 0.16                 | 0.02             | 794.58             |
| 738.59 | 0.04                 | 0.01             | 193.39             |
| 739.09 | 0.01                 | 0                | 39.79              |

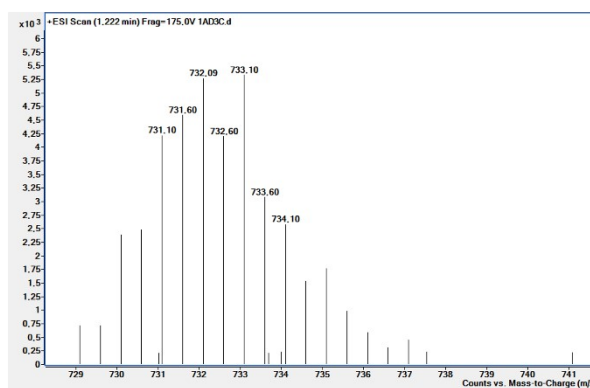

Found

# Compound 4

Calculated for  $C_{22}H_{16}N_2PdO_2 [M]^{2+}$  223.01; found 223.01

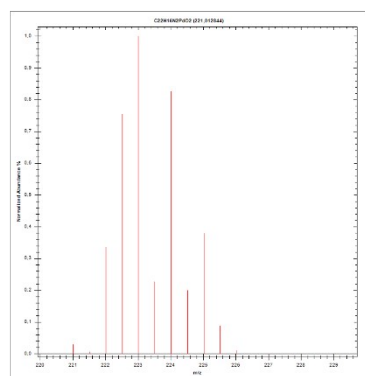

| m/z    | Abund<br>(% largest) | Abund<br>(% sum) | Abund<br>(% first) |
|--------|----------------------|------------------|--------------------|
| 221.01 | 3.07                 | 0.79             | 100                |
| 221.51 | 0.76                 | 0.2              | 24.79              |
| 222.01 | 33.62                | 8.7              | 1095.51            |
| 222.51 | 75.5                 | 19.53            | 2460.24            |
| 223.01 | 100                  | 25.87            | 3258.66            |
| 223.51 | 22.74                | 5.88             | 741.04             |
| 224.01 | 82.59                | 21.36            | 2691.31            |
| 224.51 | 20.01                | 5.18             | 652.2              |
| 225.01 | 37.95                | 9.82             | 1236.68            |
| 225.51 | 9                    | 2.33             | 293.24             |
| 226.02 | 1.2                  | 0.31             | 39.16              |
| 226.52 | 0.12                 | 0.03             | 3.76               |
| 227.02 | 0.01                 | 0                | 0.28               |

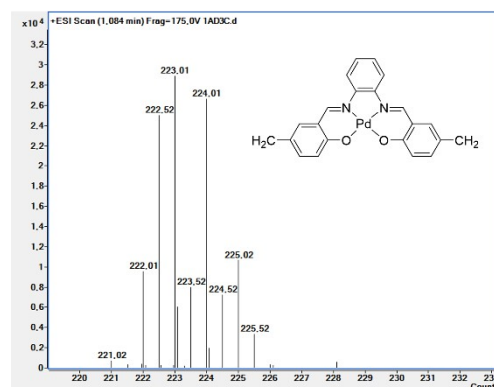

Calculated for  $C_6H_7N [M + H]^+$  94.07; found 94.07

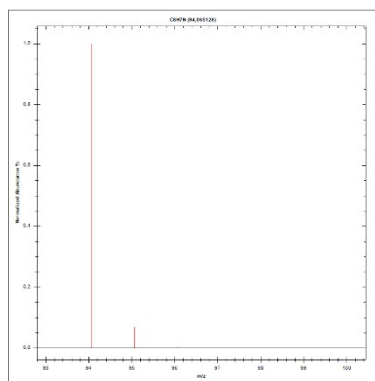

Calculated

| m/z   | Abund<br>(% largest) | Abund<br>(% sum) | Abund<br>(% first) |
|-------|----------------------|------------------|--------------------|
| 94.07 | 100                  | 93.32            | 100                |
| 95.07 | 6.95                 | 6.48             | 6.95               |
| 96.07 | 0.21                 | 0.19             | 0.21               |
| 97.07 | 0                    | 0                | 0                  |

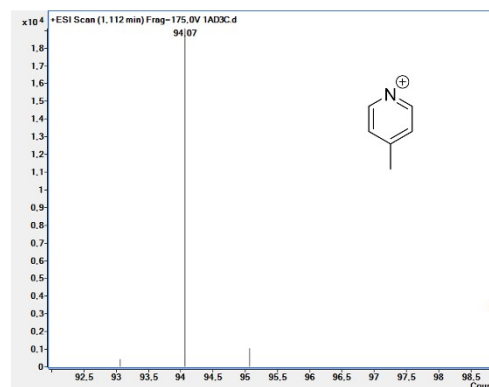

Found

### Compound 5

Calculated for  $(C_{34}H_{30}N_4O_2Pt)(Cl)_2 [M]^{2+}$  757.17; found 757.17

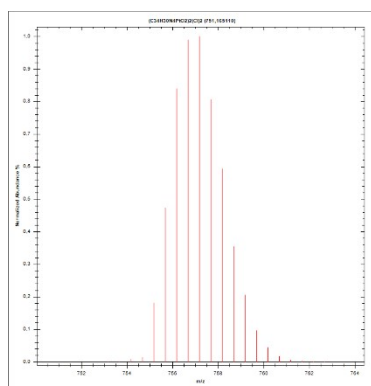

| m/z    | Abund<br>(% largest) | Abund<br>(% sum) | Abund<br>(% first) |
|--------|----------------------|------------------|--------------------|
| 751.17 | 0                    | 0                | 100                |
| 751.67 | 0                    | 0                | 77.31              |
| 752.17 | 0                    | 0                | 11265.72           |
| 752.67 | 0                    | 0                | 8694.36            |
| 753.17 | 0.02                 | 0                | 793524.62          |
| 753.67 | 0.03                 | 0.01             | 1095073            |
| 754.17 | 0.81                 | 0.14             | 27782374           |
| 754.67 | 1.41                 | 0.25             | 48520740           |
| 755.17 | 18.09                | 3.21             | 621286464          |
| 755.67 | 47.26                | 8.39             | 1623495296         |
| 756.17 | 83.97                | 14.92            | 2884638720         |
| 756.67 | 98.96                | 17.58            | 3399493888         |
| 757.17 | 100                  | 17.76            | 343523584          |
| 757.67 | 80.56                | 14.31            | 2767489792         |
| 758.17 | 59.27                | 10.53            | 2035922048         |
| 758.67 | 35.47                | 6.3              | 1218424832         |
| 759.17 | 20.6                 | 3.66             | 707687040          |
| 759.67 | 9.66                 | 1.72             | 331954944          |
| 760.17 | 4.38                 | 0.78             | 150623472          |
| 760.67 | 1.68                 | 0.3              | 57688952           |
| 761.17 | 0.57                 | 0.1              | 19728406           |
| 761.67 | 0.17                 | 0.03             | 5990175            |

Calculated

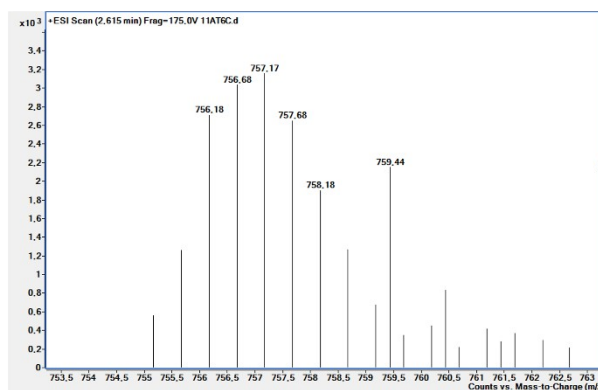

Found

### Compound 5

Calculated for  $C_{22}H_{16}N_2PtO_2 [M]^{2+}$  267.54; found 267.54

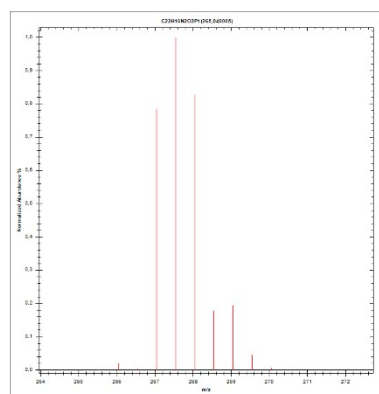

| m/z    | Abund<br>(% largest) | Abund<br>(% sum) | Abund<br>(% first) |
|--------|----------------------|------------------|--------------------|
| 265.04 | 0.03                 | 0.01             | 100                |
| 265.54 | 0.01                 | 0                | 24.79              |
| 266.04 | 1.86                 | 0.61             | 5589.07            |
| 266.54 | 0.46                 | 0.15             | 1384.77            |
| 267.04 | 78.54                | 25.68            | 235665.88          |
| 267.54 | 100                  | 32.69            | 300039.72          |
| 268.04 | 82.69                | 27.03            | 248091.8           |
| 268.54 | 17.85                | 5.84             | 53553.36           |
| 269.04 | 19.35                | 6.33             | 58050.08           |
| 269.55 | 4.44                 | 1.45             | 13328.6            |
| 270.05 | 0.59                 | 0.19             | 1763.34            |
| 270.55 | 0.06                 | 0.02             | 168.78             |
| 271.05 | 0                    | 0                | 12.69              |

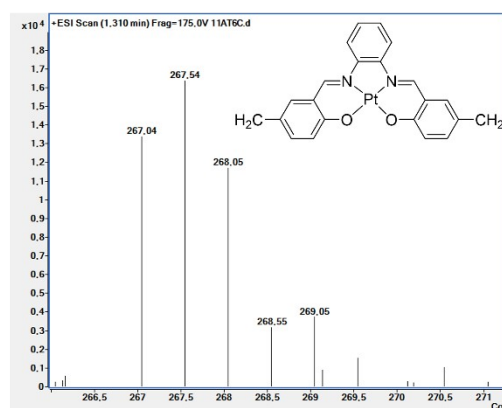

Calculated for  $C_6H_7N [M + H]^+$  94.07; found 94.07

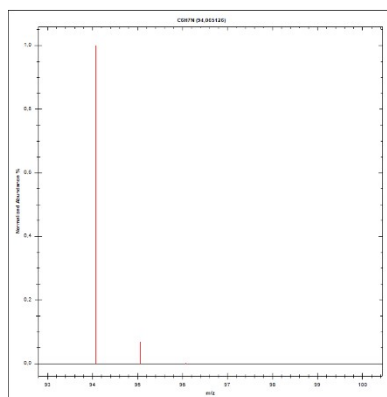

Calculated

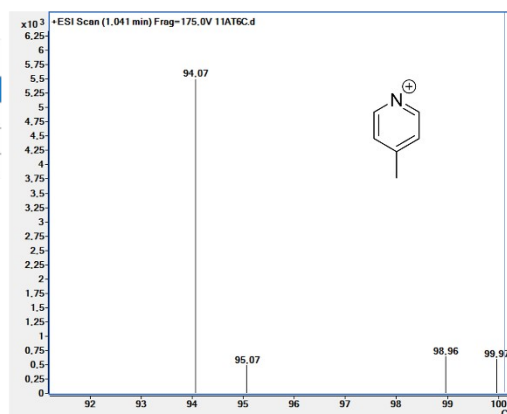

Found

## Compound 6

Calculated for  $(C_{30}H_{30}N_4O_2Ni)_2(ClO_4)_2 [M]^{2+}$  636.12; found 636.12

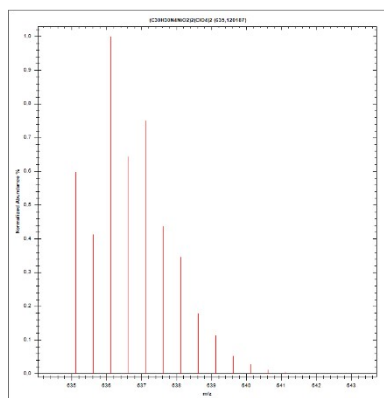

Calculated

| m/z    | Abund<br>(% largest) | Abund<br>(% sum) | Abund<br>(% first) |
|--------|----------------------|------------------|--------------------|
| 635.12 | 59.91                | 13.07            | 100                |
| 635.62 | 41.32                | 9.01             | 68.96              |
| 636.12 | 100                  | 21.81            | 166.92             |
| 636.62 | 64.42                | 14.05            | 107.53             |
| 637.12 | 75.09                | 16.38            | 125.34             |
| 637.62 | 43.72                | 9.54             | 72.98              |
| 638.12 | 34.63                | 7.55             | 57.8               |
| 638.62 | 17.96                | 3.92             | 29.97              |
| 639.12 | 11.3                 | 2.46             | 18.86              |
| 639.62 | 5.28                 | 1.15             | 8.82               |
| 640.12 | 2.79                 | 0.61             | 4.65               |
| 640.62 | 1.19                 | 0.26             | 1.98               |
| 641.12 | 0.53                 | 0.11             | 0.88               |
| 641.62 | 0.2                  | 0.04             | 0.33               |

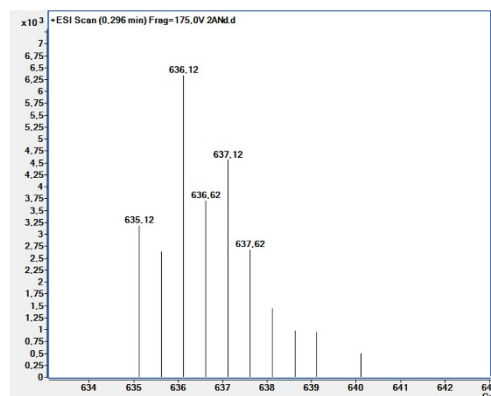

Found

## Compound 6

Calculated for  $C_{18}H_{16}N_2NiO_2 [M]^{2+}$  175.03; found 175.03

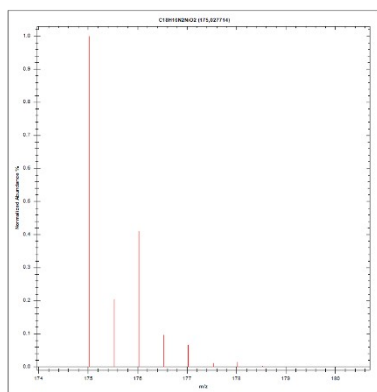

| m/z    | Abund<br>(% largest) | Abund<br>(% sum) | Abund<br>(% first) |
|--------|----------------------|------------------|--------------------|
| 175.03 | 100                  | 55.31            | 100                |
| 175.53 | 20.46                | 11.32            | 20.46              |
| 176.03 | 40.92                | 22.63            | 40.92              |
| 176.53 | 9.76                 | 5.4              | 9.76               |
| 177.02 | 6.62                 | 3.66             | 6.62               |
| 177.53 | 1.21                 | 0.67             | 1.21               |
| 178.02 | 1.5                  | 0.83             | 1.5                |
| 178.53 | 0.29                 | 0.16             | 0.29               |
| 179.03 | 0.03                 | 0.02             | 0.03               |

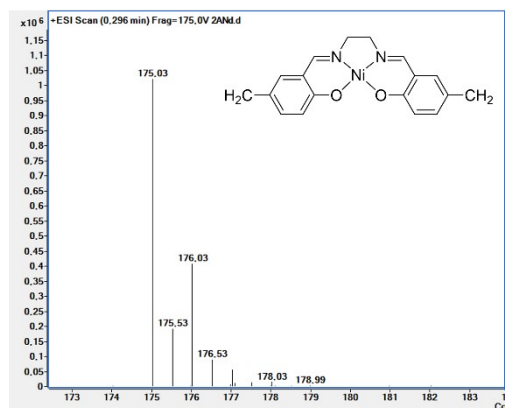

Calculated for  $C_6H_7N [M + H]^+$  94.07; found 94.07

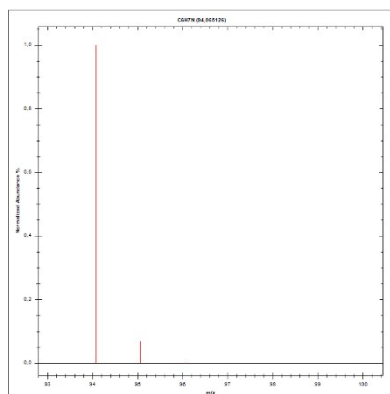

| m/z   | Abund<br>(% largest) | Abund<br>(% sum) | Abund<br>(% first) |
|-------|----------------------|------------------|--------------------|
| 94.07 | 100                  | 93.32            | 100                |
| 95.07 | 6.95                 | 6.48             | 6.95               |
| 96.07 | 0.21                 | 0.19             | 0.21               |
| 97.07 | 0                    | 0                | 0                  |

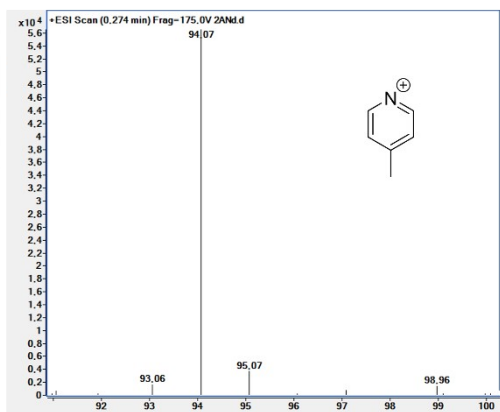

## Compound 7

Calculated for  $C_{18}H_{16}N_2ZnO_2 [M]^{2+}$  178.02; found 178.02

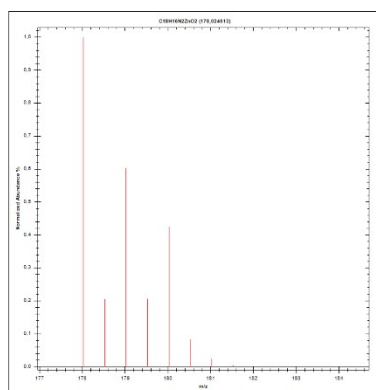

| m/z    | Abund<br>(% largest) | Abund<br>(% sum) | Abund<br>(% first) |
|--------|----------------------|------------------|--------------------|
| 178.02 | 100                  | 39.22            | 100                |
| 178.53 | 20.46                | 8.02             | 20.46              |
| 179.02 | 60.35                | 23.67            | 60.35              |
| 179.52 | 20.56                | 8.06             | 20.56              |
| 180.02 | 42.56                | 16.69            | 42.56              |
| 180.52 | 8.39                 | 3.29             | 8.39               |
| 181.02 | 2.28                 | 0.89             | 2.28               |
| 181.52 | 0.35                 | 0.14             | 0.35               |
| 182.03 | 0.04                 | 0.01             | 0.04               |
| 182.53 | 0                    | 0                | 0                  |

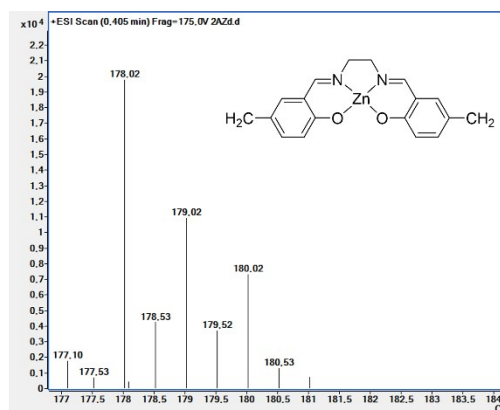

Calculated for  $C_6H_7N [M + H]^+$  94.07; found 94.07

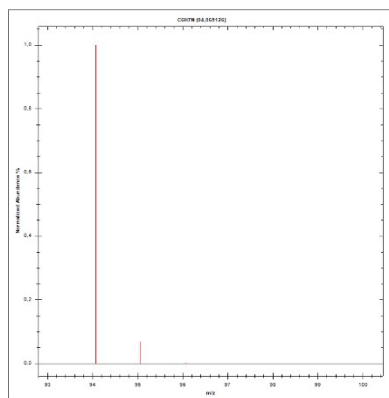

| m/z   | Abund<br>(% largest) | Abund<br>(% sum) | Abund<br>(% first) |
|-------|----------------------|------------------|--------------------|
| 94.07 | 100                  | 93.32            | 100                |
| 95.07 | 6.95                 | 6.48             | 6.95               |
| 96.07 | 0.21                 | 0.19             | 0.21               |
| 97.07 | 0                    | 0                | 0                  |

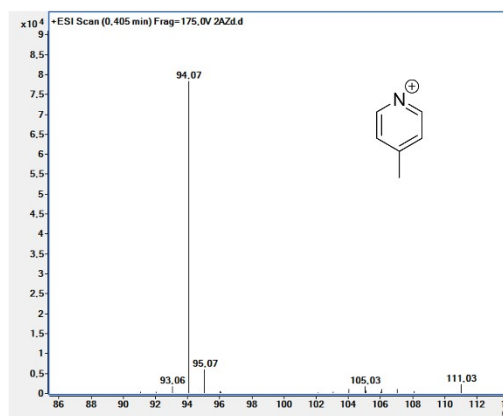

# Compound 8

Calculated for  $C_{18}H_{16}N_2CuO_2 [M]^{2+}$  177.52; found 177.53

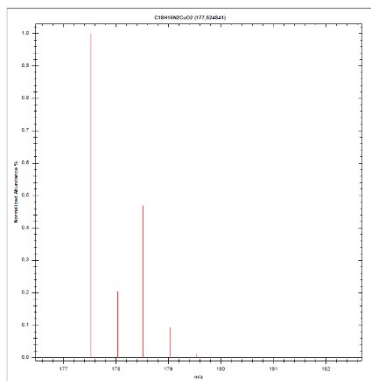

| m/z    | Abund<br>(% largest) | Abund<br>(% sum) | Abund<br>(% first) |
|--------|----------------------|------------------|--------------------|
| 177.52 | 100                  | 56.18            | 100                |
| 178.03 | 20.46                | 11.49            | 20.46              |
| 178.52 | 47.01                | 26.41            | 47.01              |
| 179.03 | 9.33                 | 5.24             | 9.33               |
| 179.53 | 1.08                 | 0.61             | 1.08               |
| 180.03 | 0.09                 | 0.05             | 0.09               |
| 180.53 | 0.01                 | 0                | 0.01               |

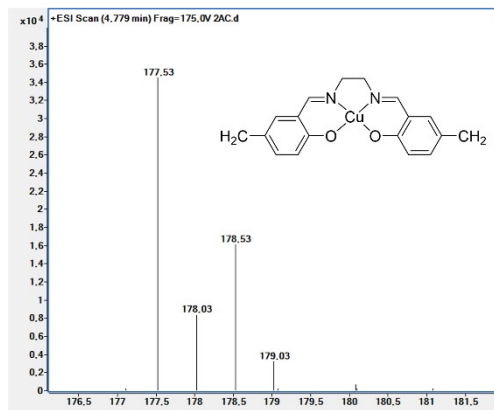

Calculated for  $C_6H_7N [M + H]^+$  94.07; found 94.07

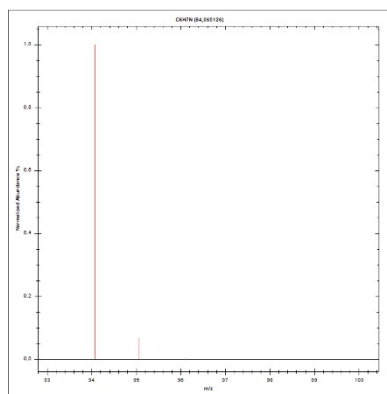

| m/z   | Abund<br>(% largest) | Abund<br>(% sum) | Abund<br>(% first) |
|-------|----------------------|------------------|--------------------|
| 94.07 | 100                  | 93.32            | 100                |
| 95.07 | 6.95                 | 6.48             | 6.95               |
| 96.07 | 0.21                 | 0.19             | 0.21               |
| 97.07 | 0                    | 0                | 0                  |

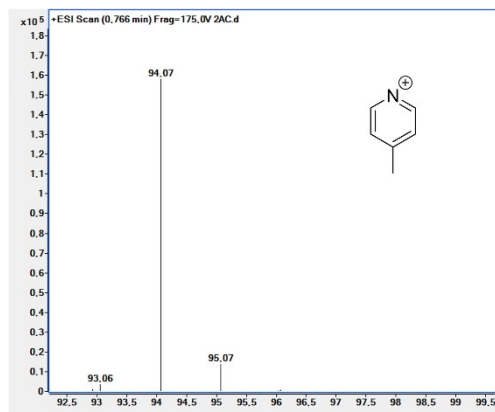

### Compound 9

Calculated for  $C_{18}H_{16}N_2PdO_2$   $[M]^{2+}$  199.01; found 199.01

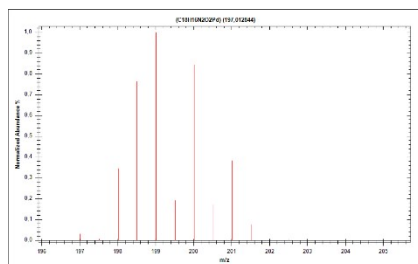

| m/z    | Abund<br>(% largest) | Abund<br>(% sum) | Abund<br>(% first) |
|--------|----------------------|------------------|--------------------|
| 197.01 | 3.17                 | 0.83             | 100                |
| 197.51 | 0.65                 | 0.17             | 20.46              |
| 198.01 | 34.71                | 9.07             | 1094.55            |
| 198.51 | 76.51                | 20               | 2412.87            |
| 199.01 | 100                  | 26.13            | 3153.5             |
| 199.51 | 19.12                | 5                | 602.91             |
| 200.01 | 84.45                | 22.07            | 2663               |
| 200.51 | 17.01                | 4.45             | 536.56             |
| 201.01 | 38.42                | 10.04            | 1211.59            |
| 201.51 | 7.62                 | 1.99             | 240.43             |
| 202.02 | 0.88                 | 0.23             | 27.9               |
| 202.52 | 0.08                 | 0.02             | 2.38               |
| 203.02 | 0.01                 | 0                | 0.16               |
| 203.52 | 0                    | 0                | 0.01               |

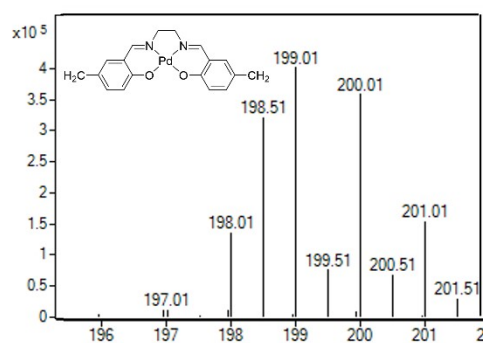

Calculated for  $C_6H_7N$   $[M + H]^+$  94.07; found 94.08

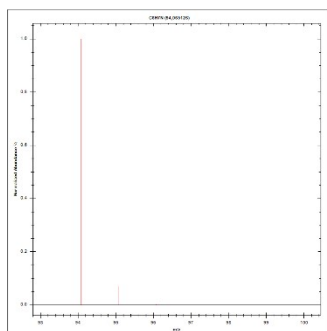

| m/z   | Abund<br>(% largest) | Abund<br>(% sum) | Abund<br>(% first) |
|-------|----------------------|------------------|--------------------|
| 94.07 | 100                  | 93.32            | 100                |
| 95.07 | 6.95                 | 6.48             | 6.95               |
| 96.07 | 0.21                 | 0.19             | 0.21               |
| 97.07 | 0                    | 0                | 0                  |

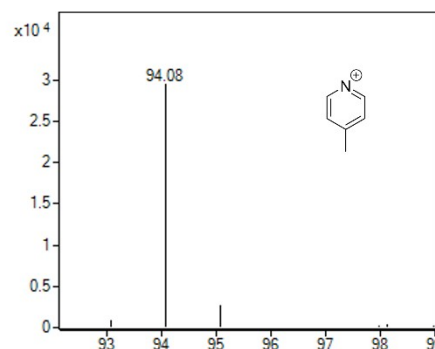

### Compound 10

Calculated for  $C_{26}H_{18}N_2NiO_2$   $[M]^{2+}$  224.04; found 224.03

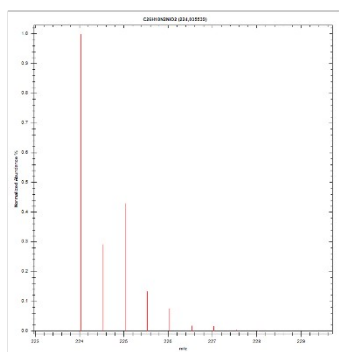

| m/z    | Abund<br>(% largest) | Abund<br>(% sum) | Abund<br>(% first) |
|--------|----------------------|------------------|--------------------|
| 224.04 | 100                  | 50.74            | 100                |
| 224.54 | 29.13                | 14.78            | 29.13              |
| 225.03 | 43.02                | 21.83            | 43.02              |
| 225.53 | 13.39                | 6.79             | 13.39              |
| 226.03 | 7.6                  | 3.86             | 7.6                |
| 226.53 | 1.82                 | 0.92             | 1.82               |
| 227.03 | 1.62                 | 0.82             | 1.62               |
| 227.53 | 0.42                 | 0.22             | 0.42               |
| 228.04 | 0.06                 | 0.03             | 0.06               |
| 228.54 | 0.01                 | 0                | 0.01               |

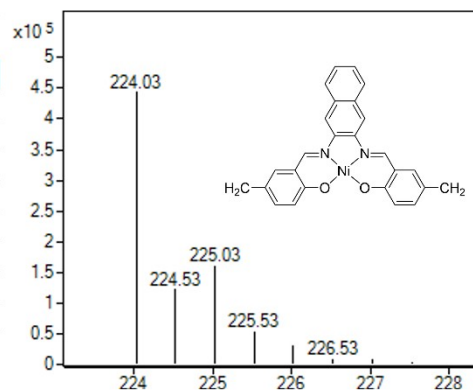

Calculated for  $C_6H_7N$   $[M + H]^+$  94.07; found 94.08

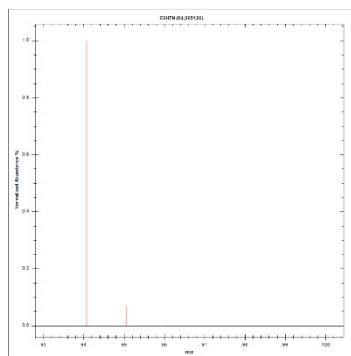

| m/z   | Abund<br>(% largest) | Abund<br>(% sum) | Abund<br>(% first) |
|-------|----------------------|------------------|--------------------|
| 94.07 | 100                  | 93.32            | 100                |
| 95.07 | 6.95                 | 6.48             | 6.95               |
| 96.07 | 0.21                 | 0.19             | 0.21               |
| 97.07 | 0                    | 0                | 0                  |

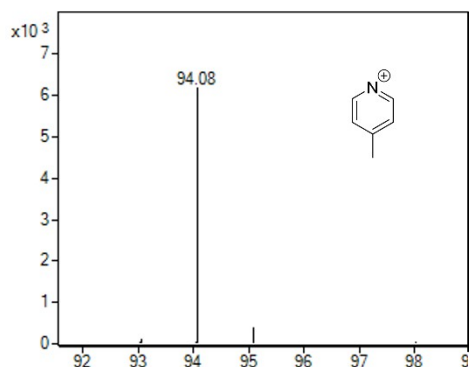

# Compound 11

Calculated for  $C_{26}H_{18}N_2ZnO_2$   $[M]^{2+}$  227.03; found 227.03

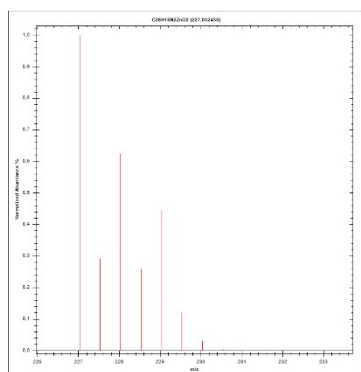

| m/z    | Abund<br>(% largest) | Abund<br>(% sum) | Abund<br>(% first) |
|--------|----------------------|------------------|--------------------|
| 227.03 | 100                  | 35.98            | 100                |
| 227.53 | 29.13                | 10.48            | 29.13              |
| 228.03 | 62.46                | 22.47            | 62.46              |
| 228.53 | 25.87                | 9.31             | 25.87              |
| 229.03 | 44.54                | 16.02            | 44.54              |
| 229.53 | 12.15                | 4.37             | 12.15              |
| 230.03 | 3.15                 | 1.13             | 3.15               |
| 230.53 | 0.58                 | 0.21             | 0.58               |
| 231.03 | 0.08                 | 0.03             | 0.08               |
| 231.54 | 0.01                 | 0                | 0.01               |

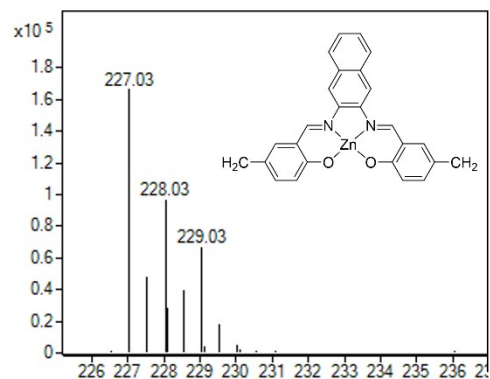

Calculated for  $C_6H_7N$   $[M + H]^+$  94.07; found 94.08

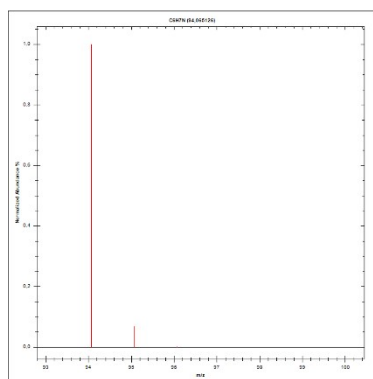

| m/z   | Abund<br>(% largest) | Abund<br>(% sum) | Abund<br>(% first) |
|-------|----------------------|------------------|--------------------|
| 94.07 | 100                  | 93.32            | 100                |
| 95.07 | 6.95                 | 6.48             | 6.95               |
| 96.07 | 0.21                 | 0.19             | 0.21               |
| 97.07 | 0                    | 0                | 0                  |

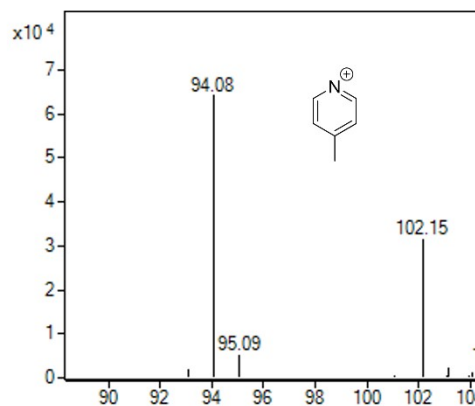

### Compound 12

Calculated for  $(C_{38}H_{32}N_4O_2Cu)_2(ClO_4)_2 [M]^{2+}$  739.13; found 739.13

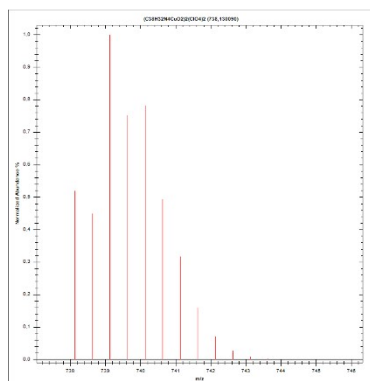

Calculated

| m/z    | Abund<br>(% largest) | Abund<br>(% sum) | Abund<br>(% first) |
|--------|----------------------|------------------|--------------------|
| 738.13 | 51.95                | 11.35            | 100                |
| 738.63 | 44.84                | 9.79             | 86.32              |
| 739.13 | 100                  | 21.84            | 192.49             |
| 739.63 | 75.18                | 16.42            | 144.71             |
| 740.13 | 78.18                | 17.07            | 150.49             |
| 740.63 | 49.37                | 10.78            | 95.02              |
| 741.13 | 31.67                | 6.92             | 60.96              |
| 741.63 | 15.97                | 3.49             | 30.73              |
| 742.13 | 7.01                 | 1.53             | 13.49              |
| 742.63 | 2.63                 | 0.57             | 5.06               |
| 743.13 | 0.82                 | 0.18             | 1.58               |
| 743.63 | 0.21                 | 0.05             | 0.41               |
| 744.13 | 0.05                 | 0.01             | 0.09               |
| 744.63 | 0.01                 | 0                | 0.02               |

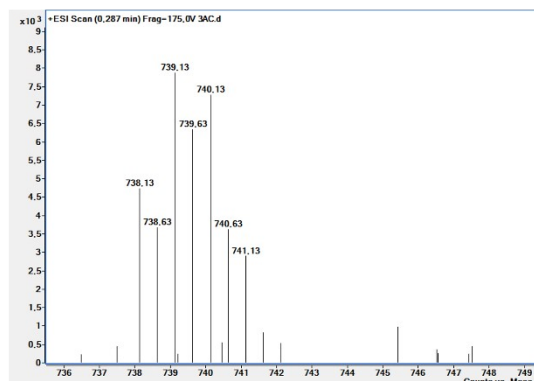

Found

### Compound 12

Calculated for  $C_{26}H_{18}N_2CuO_2 [M]^{2+}$  226.53; found 226.53

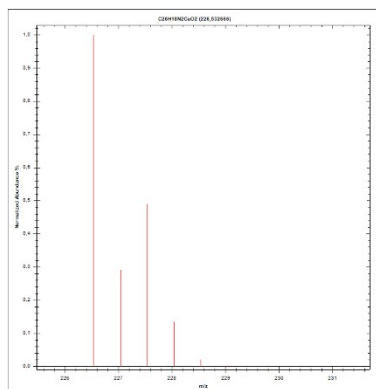

| m/z    | Abund<br>(% largest) | Abund<br>(% sum) | Abund<br>(% first) |
|--------|----------------------|------------------|--------------------|
| 226.53 | 100                  | 51.54            | 100                |
| 227.03 | 29.13                | 15.02            | 29.13              |
| 227.53 | 49.11                | 25.31            | 49.11              |
| 228.03 | 13.49                | 6.95             | 13.49              |
| 228.53 | 2.05                 | 1.06             | 2.05               |
| 229.04 | 0.22                 | 0.11             | 0.22               |
| 229.54 | 0.02                 | 0.01             | 0.02               |
| 230.04 | 0                    | 0                | 0                  |
| 230.54 | 0                    | 0                | 0                  |

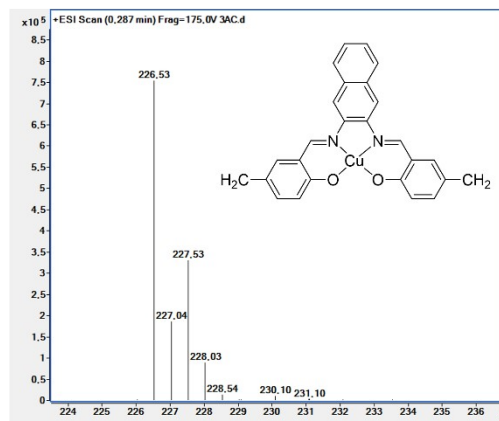

Calculated for  $C_6H_7N [M + H]^+$  94.07; found 94.07

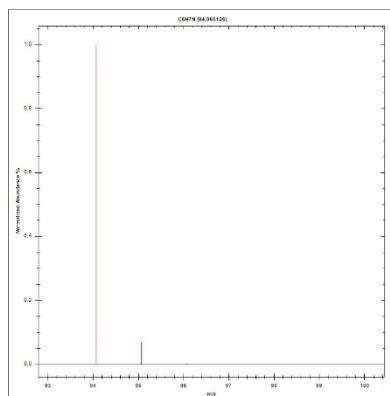

| m/z   | Abund<br>(% largest) | Abund<br>(% sum) | Abund<br>(% first) |
|-------|----------------------|------------------|--------------------|
| 94.07 | 100                  | 93.32            | 100                |
| 95.07 | 6.95                 | 6.48             | 6.95               |
| 96.07 | 0.21                 | 0.19             | 0.21               |
| 97.07 | 0                    | 0                | 0                  |

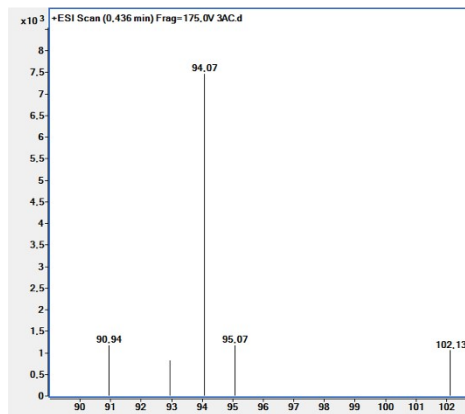

**Figure S4.** Example of FRET melting profile of cMYC G4 (0.2  $\mu$ M, black line) upon interaction with compound **1** (1  $\mu$ M, red line) in a [G4 DNA]:[compound **1**] ratio of 1:5 in 10 mM potassium cacodylate buffer, pH 7.2, showing that in such conditions the melting temperature cannot be reached.

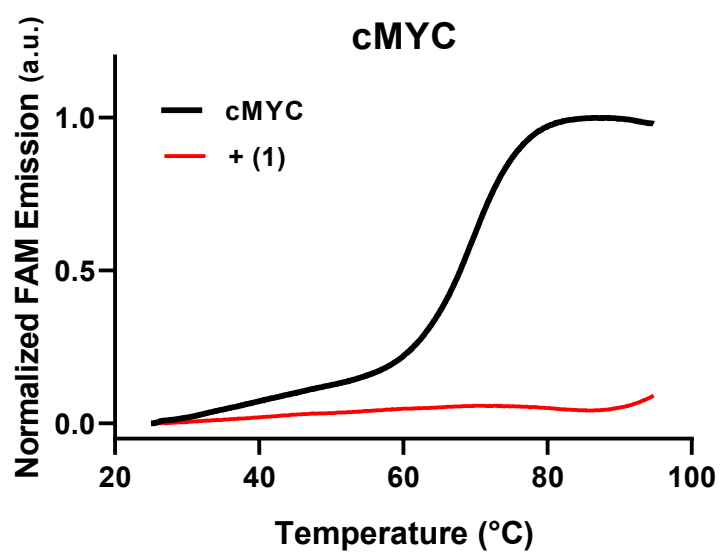

**Figure S5.** Circular dichroism spectra of ctDNA, *kRAS*, *BCL2* or *cMYC* quadruplexes in presence of increasing concentrations of complex (6) in 50 mM Tris HCl 100 mM KCl pH 7.4.

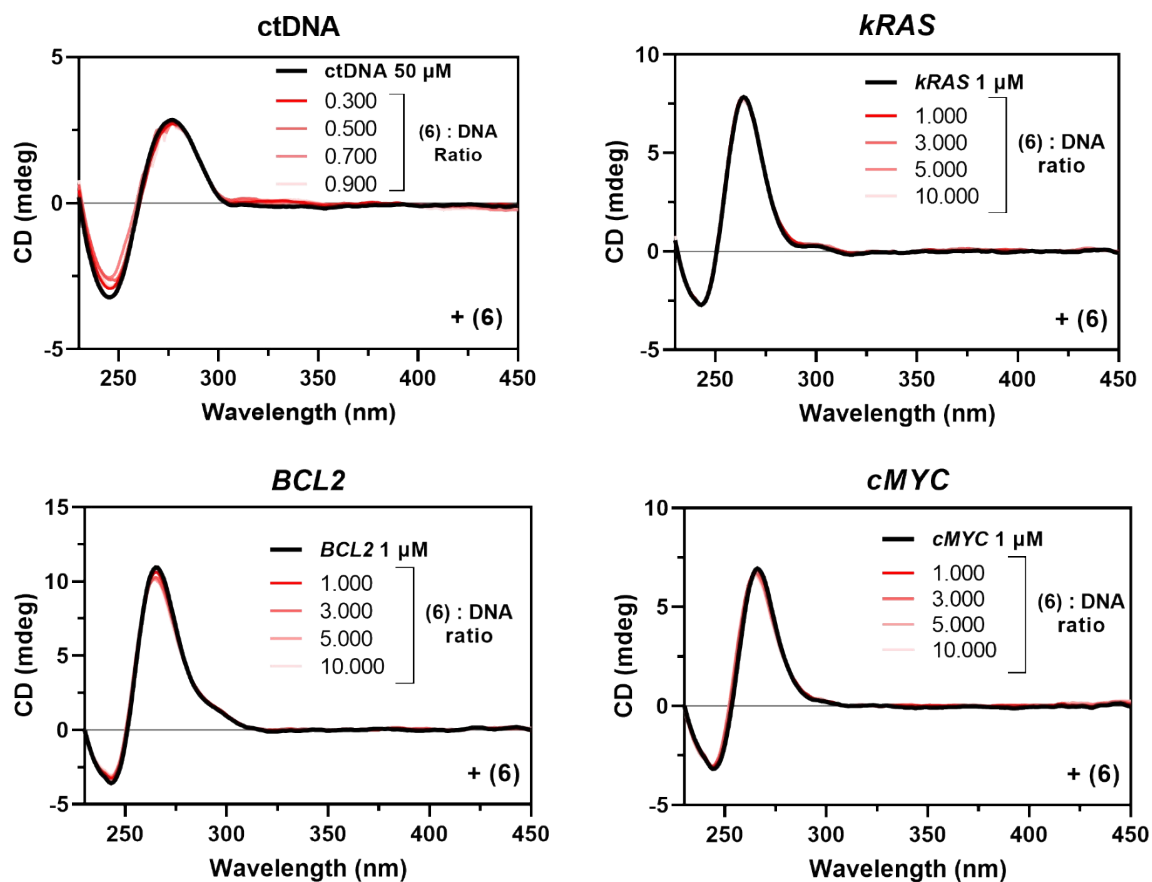

**Figure S6.** UV-vis spectra of compound (1) at 20  $\mu$ M in presence of increasing concentration of ctDNA, *kRAS*, *BCL2* or *cMYC* quadruplexes in 50 mM Tris HCl 100 mM KCl pH 7.4.

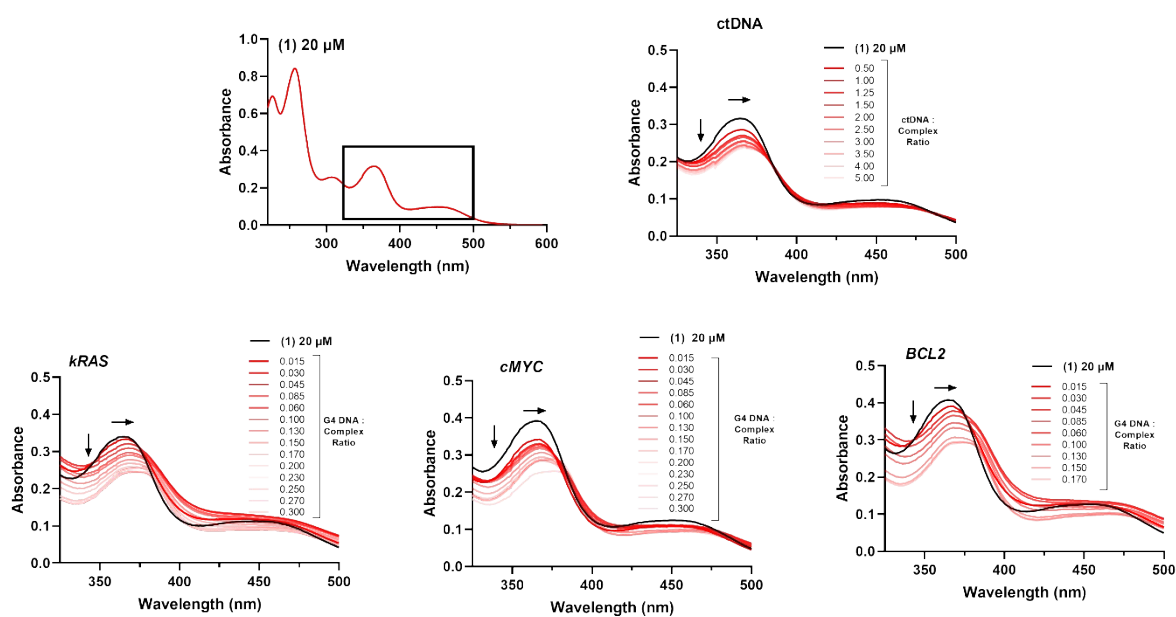

**Figure S7.** UV-vis spectra of compound **(6)** at 20  $\mu\text{M}$  in presence of increasing concentration of ctDNA, *kRAS*, *BCL2* or *cMYC* quadruplexes in 50 mM Tris HCl 100 mM KCl pH 7.4.

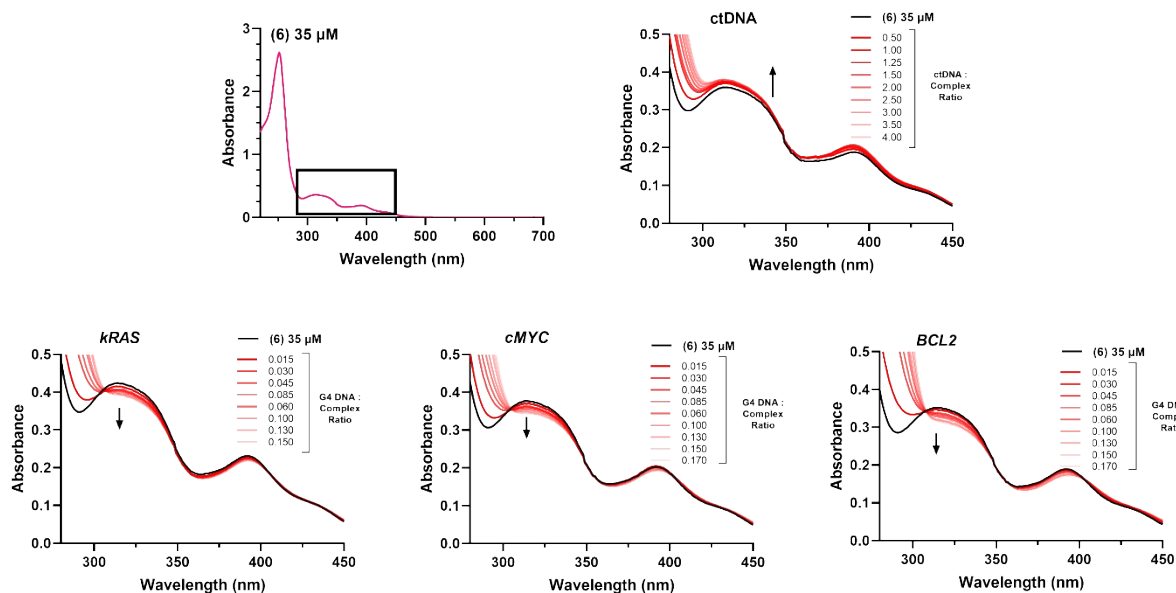

**Figure S8.** UV-vis spectra of compound **(10)** at 20  $\mu\text{M}$  in presence of increasing concentration of ctDNA, *kRAS*, *BCL2* or *cMYC* quadruplexes in 50 mM Tris HCl 100 mM KCl pH 7.4.

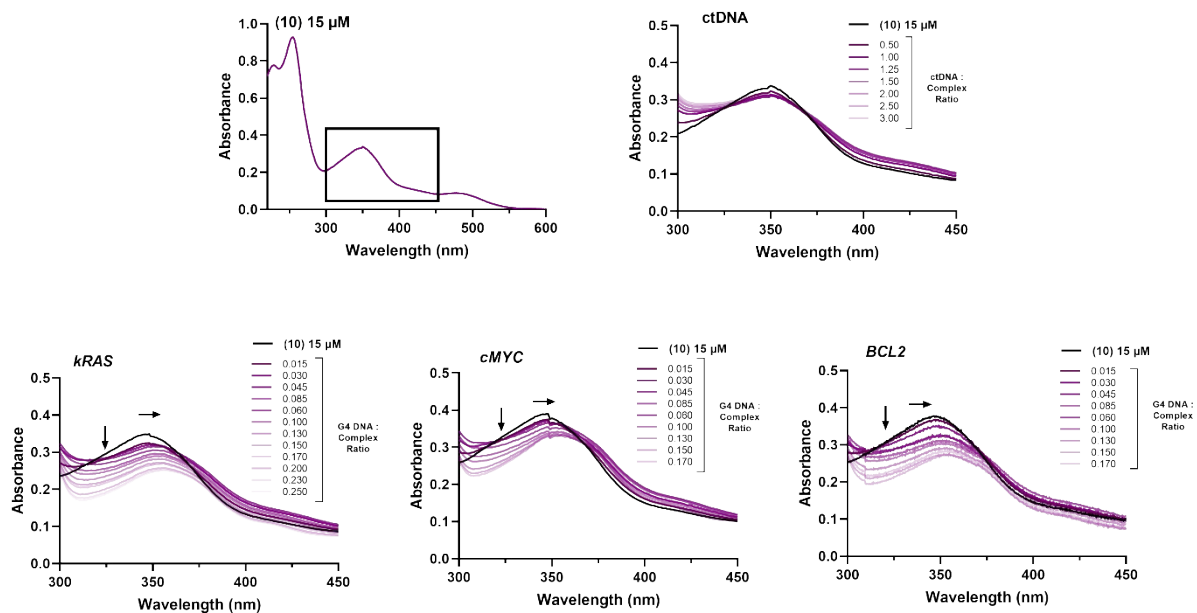

**Figure S9. IC<sub>50</sub> determination of metal complexes 1 – 12 on T3M4 cells.** Relative viability (%) of T3M4 cell line at 48 hours of treatment of the considered complex metal, obtained by crystal violet assay. *Mean ± SEM* (n=5).

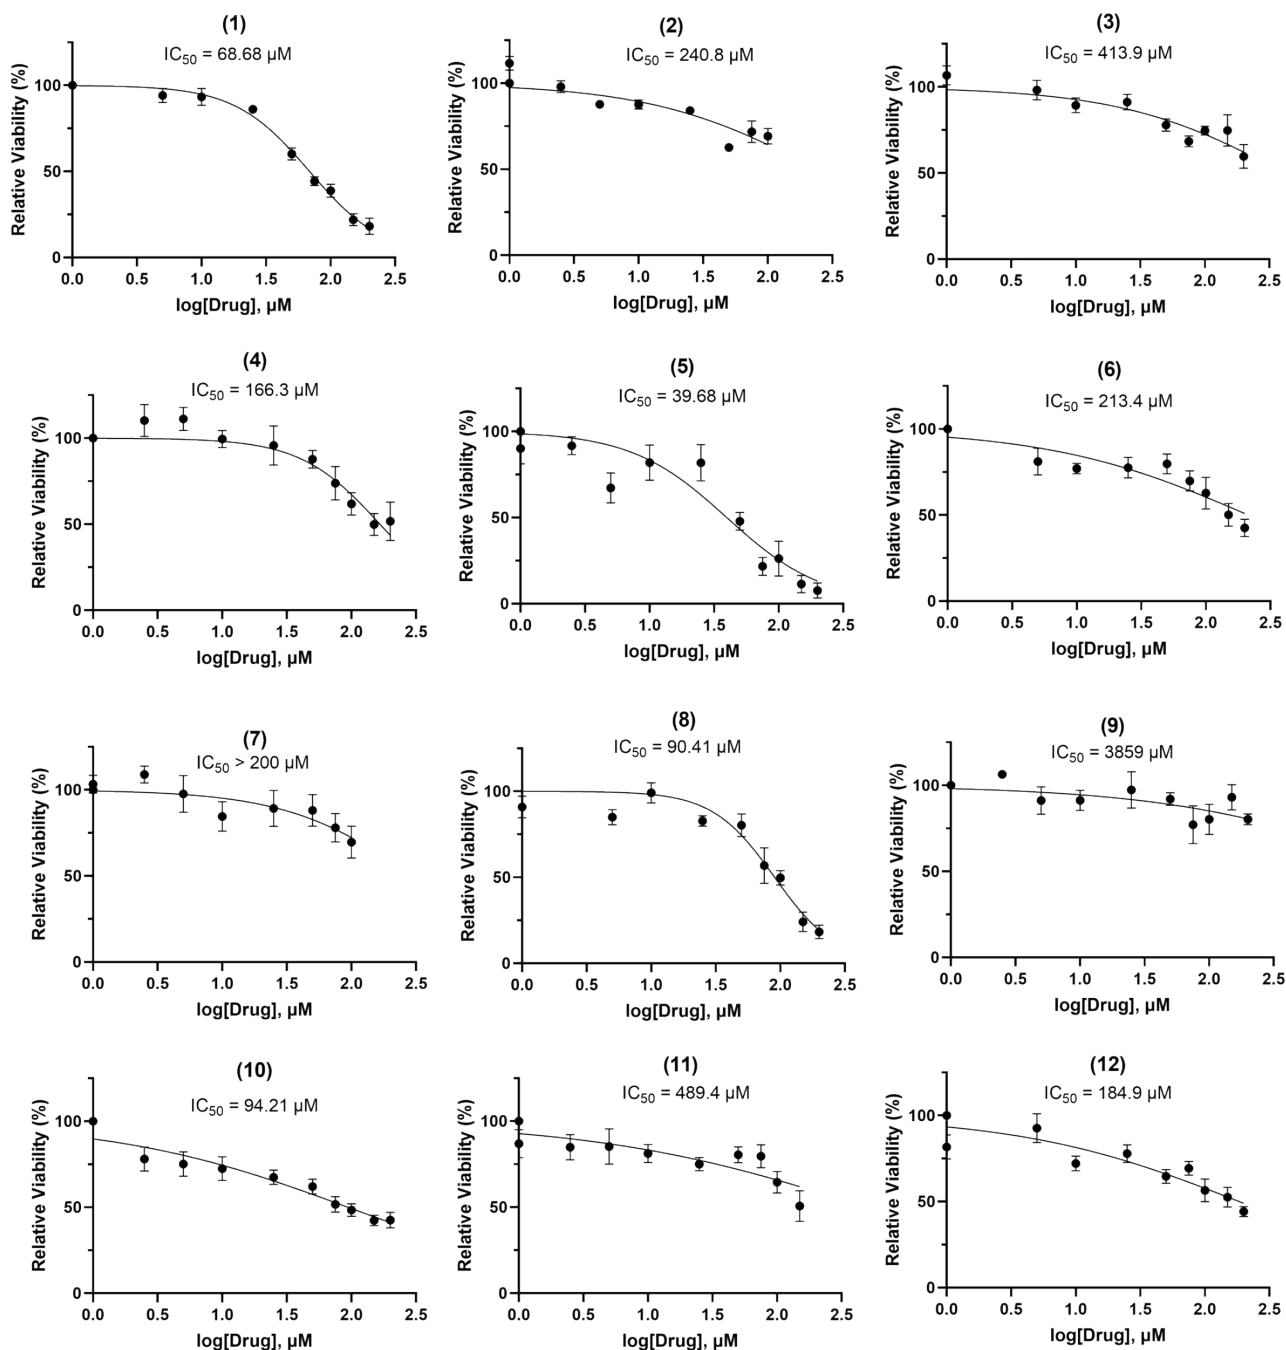

**Figure S10. IC<sub>50</sub> determination of metal complexes 1 – 12 on T47D cells.** Relative viability (%) of T47D cell line at 48 hours of treatment of the considered complex metal, obtained by crystal violet assay. *Mean ± SEM* (n=5).

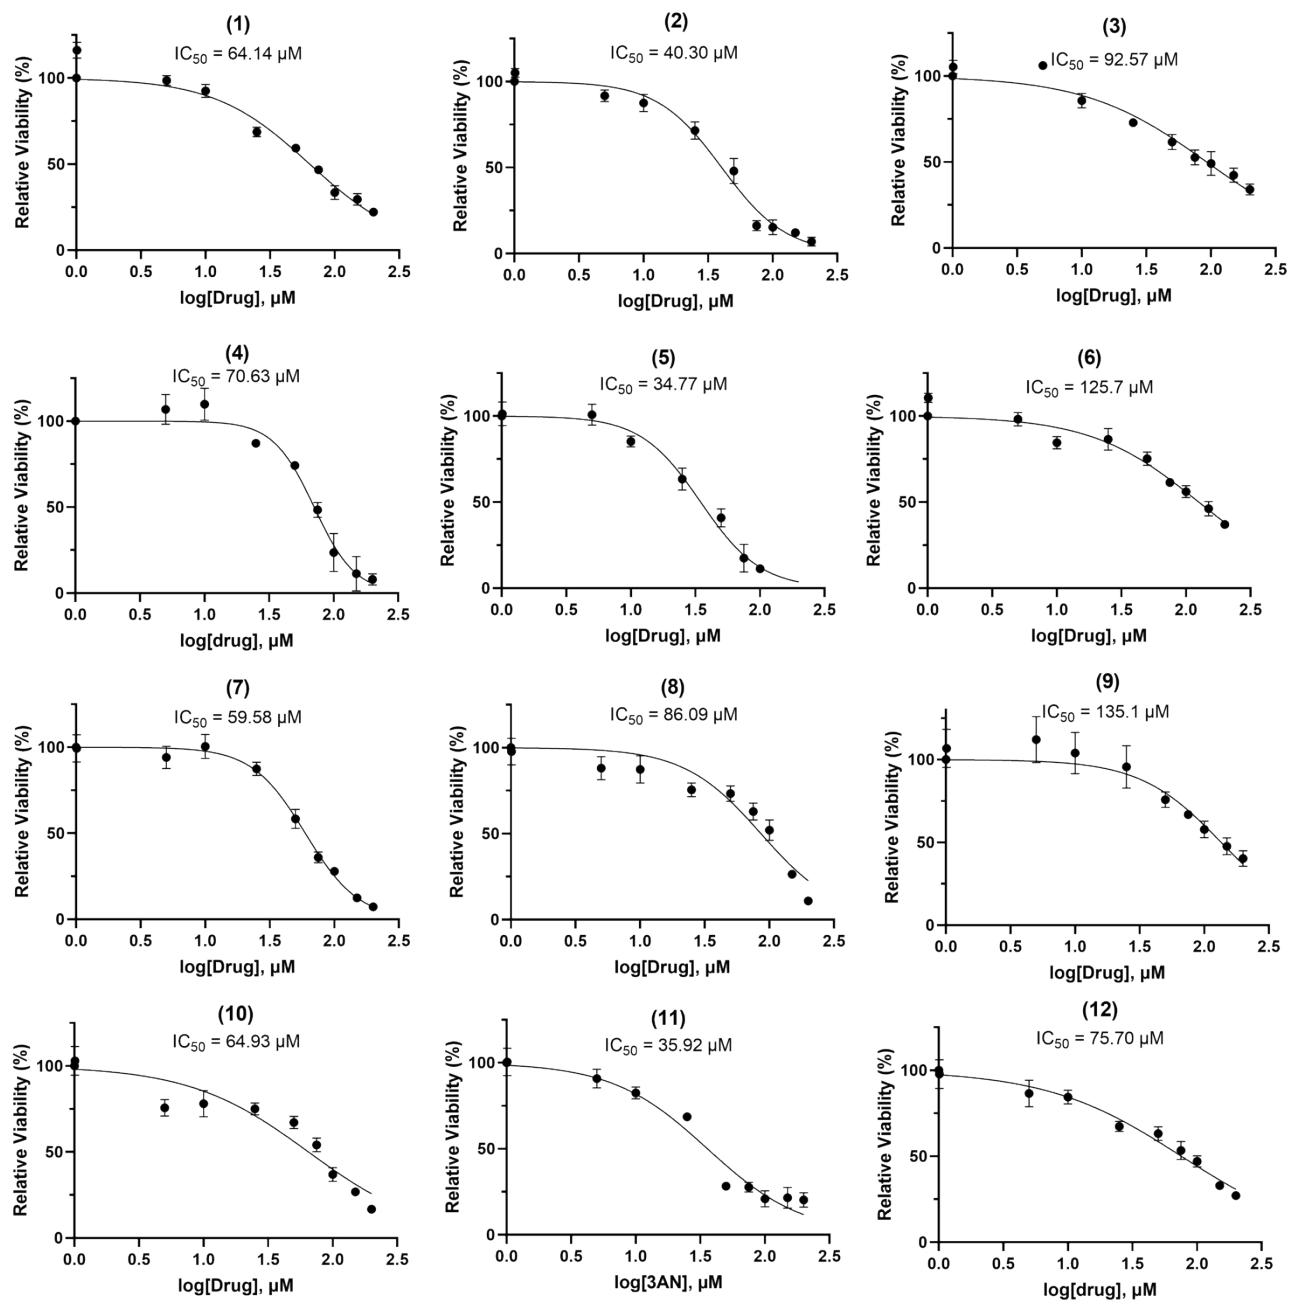

**Figure S11. IC<sub>50</sub> determination of metal complexes 1 – 12 on MDA-MB-231 cells.** Relative viability (%) of MDA-MB-231 cell line at 48 hours of treatment of the considered complex metal, obtained by crystal violet assay. *Mean ± SEM* (n=5).

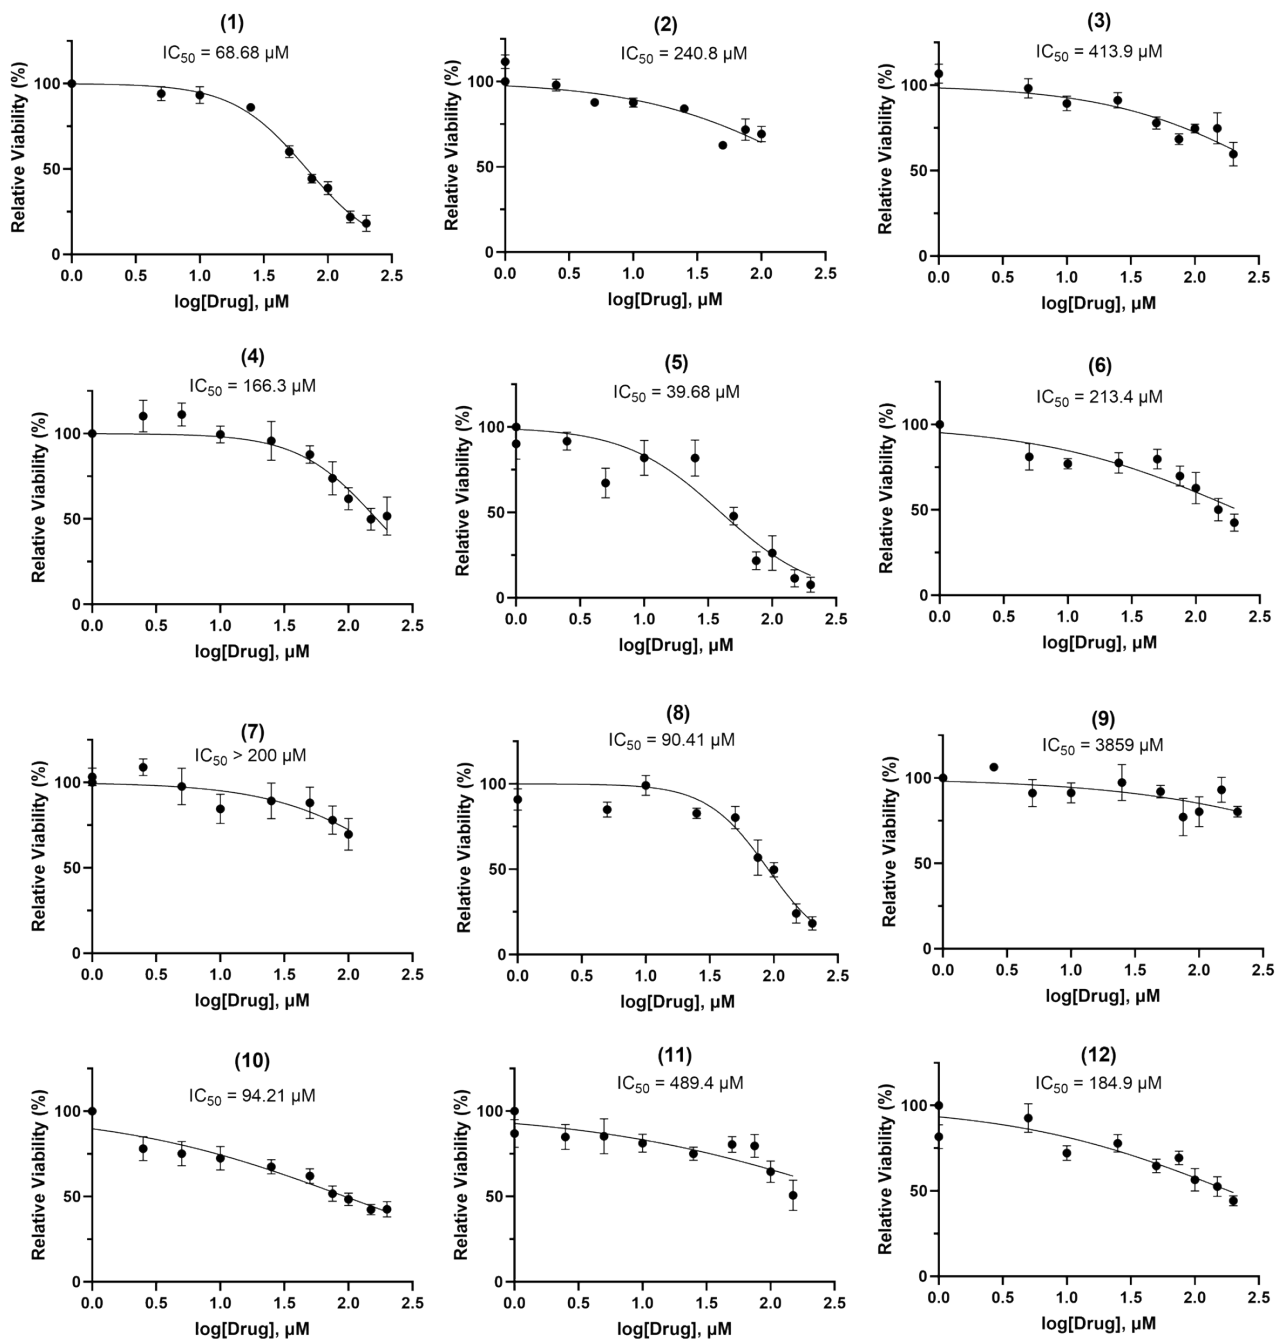

**Figure S12. Doubling time of T3M4, T47D and MDA-MB-231 cell lines.** Doubling time of T3M4 (A), T47D (B), and MDA-MB-231 (C) cell lines was determined from the proliferation follow-up of untreated cells over 72 hours using the equation:  $T = \frac{t \ln 2}{\ln(\text{day 1}) - \ln(\text{day 2})}$ . Mean  $\pm$  SEM (n=6).

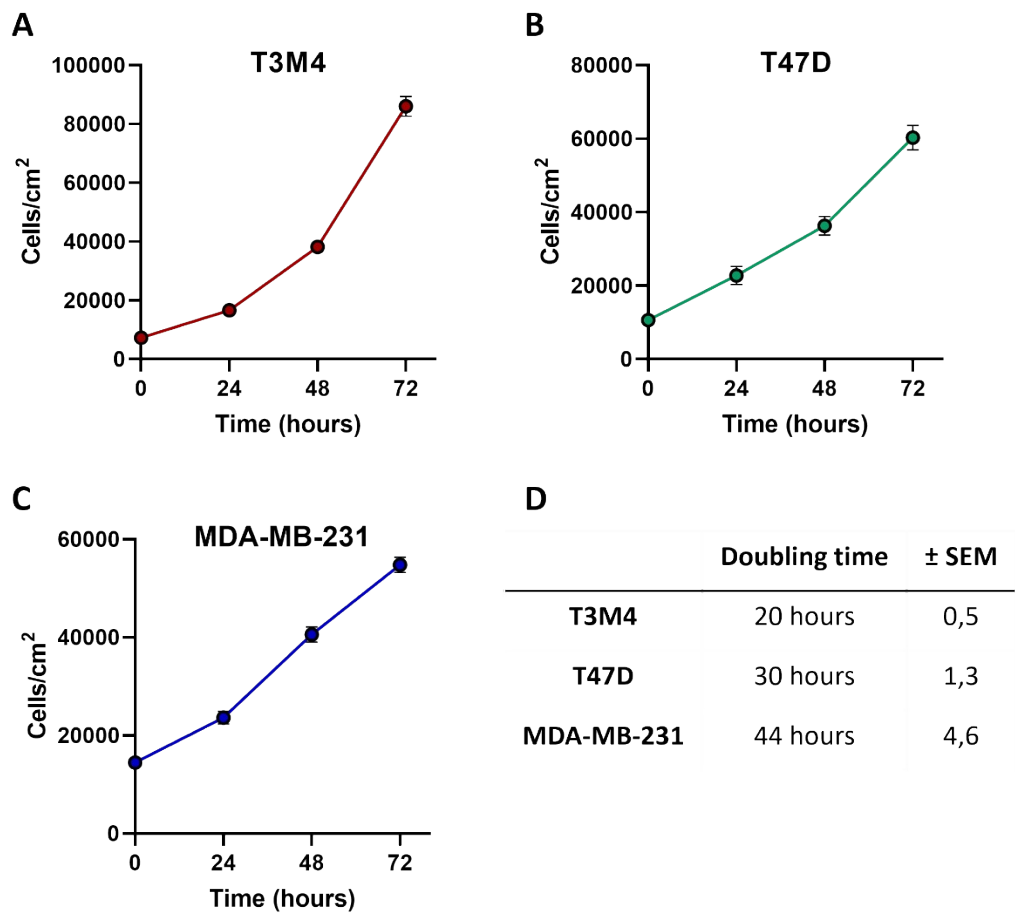

**Table S1. DNA sequences (5' – 3') of the G4 motifs used for the DNA binding studies.** The oligonucleotides were used free for the UV-visible and Circular Dichroism assays, and fluorolabelled with FAM and TAMRA probes for FRET experiments. dsDNA was used only for the FRET experiment.

| Oligonucleotide | Sequence                                          |
|-----------------|---------------------------------------------------|
| dsDNA           | 5'-/56-FAM/TATAGCTA/iSp18/TATAGCTATA/36 TAMSp/-3' |
| hTelo           | 5'-AGGGTTAGGGTTAGGGTTAGGG-3'                      |
| <i>BCL2</i>     | 5'-AGGGGCGGGCGCGGGAGGAAGGGGGCGGGA-3'              |
| <i>cKIT-1</i>   | 5'-AGGGAGGGCGCTGGGAGGAGGG-3'                      |
| <i>cKIT-2</i>   | 5'-CGGGCGGGCGCGAGGGAGGGG-3'                       |
| <i>cKIT-SP</i>  | 5'-GGCGAGGAGGGGCGTGGCCGGC-3'                      |
| <i>cMYC</i>     | 5'-TGGGGAGGGTGGGGAGGGTGGGGAAGG-3'                 |
| <i>RET</i>      | 5'-AGGGGCGGGGGCGGGGCGGGGT-3'                      |
| <i>kRAS</i>     | 5'-AGGGCGGTGTGGGAAGAGGGAAGAGGGGGAGG-3'            |

**Table S2.  $\Delta$ TM values of nucleic acid sequences upon interaction with metal complexes 1 – 12.** Numerical values of  $\Delta$ TM obtained by FRET melting assay of the considered nucleic acid sequences (dsDNA and G4 molecules) at 0.2  $\mu$ M in presence of 1  $\mu$ M of the tested metal complex (ratio [DNA]:[complex] = 1:5). Values are expressed as Mean  $\pm$  SEM.

|    | dsDNA           | hTelo            | <i>cKIT-1</i>    | <i>cKIT-2</i>    | <i>cKIT-SP</i>   | <i>BCL2</i>      | <i>kRAS</i>      | <i>cMYC</i>      | <i>RET</i>       |
|----|-----------------|------------------|------------------|------------------|------------------|------------------|------------------|------------------|------------------|
| 1  | 1.75 $\pm$ 0.72 | 27.36 $\pm$ 0.17 | 28.10 $\pm$ 0.13 | > 35             | 14.08 $\pm$ 1.14 | > 35             | 22.30 $\pm$ 0.16 | > 35             | > 35             |
| 2  | 0.27 $\pm$ 0.36 | 9.32 $\pm$ 0.05  | 13.92 $\pm$ 0.37 | 16.71 $\pm$ 0.13 | 5.05 $\pm$ 0.98  | 8.18 $\pm$ 0.06  | 8.71 $\pm$ 0.19  | 12.66 $\pm$ 0.05 | 13.94 $\pm$ 1.39 |
| 3  | 1.69 $\pm$ 0.25 | 22.17 $\pm$ 0.10 | 23.46 $\pm$ 0.34 | 21.54 $\pm$ 0.11 | 11.84 $\pm$ 0.09 | 14.16 $\pm$ 0.02 | 17.61 $\pm$ 0.17 | > 35             | > 35             |
| 4  | 1.58 $\pm$ 0.06 | 13.40 $\pm$ 1.87 | 27.00 $\pm$ 0.06 | 18.39 $\pm$ 0.35 | 15.25 $\pm$ 1.60 | 12.00 $\pm$ 0.52 | 30.49 $\pm$ 0.71 | 19.66 $\pm$ 0.67 | 15.28 $\pm$ 0.18 |
| 5  | 0.75 $\pm$ 0.24 | 2.49 $\pm$ 0.03  | 11.39 $\pm$ 0.27 | 16.10 $\pm$ 0.06 | 10.46 $\pm$ 0.71 | 5.30 $\pm$ 0.26  | 14.58 $\pm$ 0.26 | -2.11 $\pm$ 0.29 | 10.01 $\pm$ 0.20 |
| 6  | 0.15 $\pm$ 0.49 | 6.95 $\pm$ 0.06  | 8.36 $\pm$ 0.07  | 14.12 $\pm$ 0.03 | -0.51 $\pm$ 1.07 | 5.61 $\pm$ 0.09  | 10.99 $\pm$ 0.05 | 13.14 $\pm$ 0.16 | 14.06 $\pm$ 0.19 |
| 7  | 0.27 $\pm$ 0.01 | 0.62 $\pm$ 0.13  | 1.09 $\pm$ 0.01  | 1.45 $\pm$ 0.06  | 1.28 $\pm$ 0.85  | 0.59 $\pm$ 0.04  | 0.79 $\pm$ 0.28  | 1.66 $\pm$ 0.11  | 1.11 $\pm$ 0.06  |
| 8  | 1.18 $\pm$ 0.22 | 2.08 $\pm$ 0.60  | 6.02 $\pm$ 0.01  | 7.11 $\pm$ 0.09  | 1.52 $\pm$ 0.35  | 2.91 $\pm$ 0.05  | 5.33 $\pm$ 0.18  | 8.74 $\pm$ 0.18  | 9.77 $\pm$ 0.03  |
| 9  | 1.22 $\pm$ 0.45 | 9.71 $\pm$ 0.16  | 11.44 $\pm$ 0.14 | 13.33 $\pm$ 0.11 | 2.09 $\pm$ 0.92  | 6.98 $\pm$ 0.09  | 12.20 $\pm$ 0.10 | 9.64 $\pm$ 0.03  | > 35             |
| 10 | 1.75 $\pm$ 0.65 | 26.59 $\pm$ 0.16 | 28.94 $\pm$ 0.10 | > 35             | 11.84 $\pm$ 0.08 | > 35             | 24.68 $\pm$ 0.22 | > 35             | > 35             |
| 11 | 0.83 $\pm$ 0.98 | 9.60 $\pm$ 2.60  | 16.38 $\pm$ 1.37 | 31.00 $\pm$ 0.04 | 4.07 $\pm$ 2.21  | 7.35 $\pm$ 0.43  | 4.00 $\pm$ 0.10  | > 35             | 11.05 $\pm$ 0.28 |
| 12 | 1.41 $\pm$ 0.11 | 29.91 $\pm$ 0.35 | 30.73 $\pm$ 0.58 | > 35             | 9.71 $\pm$ 0.07  | 17.81 $\pm$ 0.10 | 20.21 $\pm$ 0.58 | > 35             | > 35             |

**Table S3. Proliferation inhibition rate of cancer cells by metal complexes 1 - 12.** Proliferation inhibition rate (%) in T3M4, T47D and MDA-MB-231 cell lines with 10 or 50  $\mu$ M of the corresponding complex for 48 or 72 hours. Proliferation inhibition of each condition was calculated relatively to its time-control and was expressed in percentage (%). *Mean  $\pm$  SEM* (n=3).

|           |             | T3M4            |                   | T47D            |                | MDA-MB-231     |                |
|-----------|-------------|-----------------|-------------------|-----------------|----------------|----------------|----------------|
|           |             | 10 $\mu$ M      | 50 $\mu$ M        | 10 $\mu$ M      | 50 $\mu$ M     | 10 $\mu$ M     | 50 $\mu$ M     |
| <b>1</b>  | <b>48 h</b> | 12.4 $\pm$ 0.8  | 61.9 $\pm$ 0.4    | -13.6 $\pm$ 3.8 | 59.3 $\pm$ 1.5 | -3.9 $\pm$ 5.1 | 32.0 $\pm$ 1.1 |
|           | <b>72 h</b> | 13.9 $\pm$ 3.7  | 83.8 $\pm$ 0.2    | -0.5 $\pm$ 2.3  | 76.4 $\pm$ 2.2 | -3.1 $\pm$ 5.9 | 35.4 $\pm$ 3.4 |
| <b>2</b>  | <b>48 h</b> | 16.8 $\pm$ 5.6  | 57.6 $\pm$ 4.7    | 11.7 $\pm$ 2.9  | 62.9 $\pm$ 0.9 | 10.6 $\pm$ 2.4 | 30.9 $\pm$ 6.9 |
|           | <b>72 h</b> | 17.2 $\pm$ 9.1  | 72.9 $\pm$ 6.7    | 7.0 $\pm$ 2.0   | 86.5 $\pm$ 0.4 | 13.2 $\pm$ 1.5 | 40.3 $\pm$ 1.5 |
| <b>3</b>  | <b>48 h</b> | 28.8 $\pm$ 0.5  | 59.0 $\pm$ 3.5    | -0.1 $\pm$ 2.8  | 18.3 $\pm$ 1.2 | -2.1 $\pm$ 1.9 | 5.2 $\pm$ 1.5  |
|           | <b>72 h</b> | 58.4 $\pm$ 1.3  | 87.7 $\pm$ 0.7    | -2.6 $\pm$ 4.5  | 33.5 $\pm$ 4.6 | 1.1 $\pm$ 2.2  | -4.5 $\pm$ 3.9 |
| <b>4</b>  | <b>48 h</b> | 24.9 $\pm$ 4.8  | 62.0 $\pm$ 0.2    | 3.7 $\pm$ 1.6   | 81.9 $\pm$ 1.4 | 5.7 $\pm$ 1.1  | 69.0 $\pm$ 5.0 |
|           | <b>72 h</b> | 27.6 $\pm$ 2.7  | 86.7 $\pm$ 0.4    | 7.6 $\pm$ 1.7   | 97.8 $\pm$ 0.3 | 2.2 $\pm$ 1.9  | 76.2 $\pm$ 3.4 |
| <b>5</b>  | <b>48 h</b> | 22.7 $\pm$ 1.6  | 60.6 $\pm$ 4.5    | 13.9 $\pm$ 3.8  | 62.4 $\pm$ 0.7 | 17.8 $\pm$ 9.7 | 77.3 $\pm$ 2.4 |
|           | <b>72 h</b> | 24.8 $\pm$ 8.6  | 75.7 $\pm$ 8.6    | 6.1 $\pm$ 3.6   | 87.8 $\pm$ 1.9 | 13.8 $\pm$ 9.1 | 93.9 $\pm$ 1.9 |
| <b>6</b>  | <b>48 h</b> | 13.8 $\pm$ 3.3  | 47.6 $\pm$ 3.9    | -5.9 $\pm$ 3.2  | 51.8 $\pm$ 3.5 | 7.1 $\pm$ 1.6  | 39.6 $\pm$ 2.9 |
|           | <b>72 h</b> | 14.7 $\pm$ 4.1  | 49.4 $\pm$ 2.4    | 5.0 $\pm$ 2.1   | 57.5 $\pm$ 3.4 | 7.9 $\pm$ 1.9  | 51.7 $\pm$ 5.7 |
| <b>7</b>  | <b>48 h</b> | 15.2 $\pm$ 9.6  | 29.5 $\pm$ 15.0   | 4.9 $\pm$ 6.3   | 50.9 $\pm$ 3.3 | 18.9 $\pm$ 1.4 | 25.5 $\pm$ 1.4 |
|           | <b>72 h</b> | 17.2 $\pm$ 12.0 | 51.7 $\pm$ 14.0   | 6.3 $\pm$ 3.7   | 72.9 $\pm$ 1.5 | 19.4 $\pm$ 1.5 | 29.4 $\pm$ 2.6 |
| <b>8</b>  | <b>48 h</b> | 6.2 $\pm$ 5.3   | 41.0 $\pm$ 3.2    | 9.9 $\pm$ 2.1   | 21.4 $\pm$ 3.6 | 11.1 $\pm$ 0.5 | 48.2 $\pm$ 6.1 |
|           | <b>72 h</b> | 13.8 $\pm$ 3.0  | 54.2 $\pm$ 0.4    | 11.0 $\pm$ 2.7  | 52.5 $\pm$ 4.4 | 21.2 $\pm$ 7.0 | 64.9 $\pm$ 3.7 |
| <b>9</b>  | <b>48 h</b> | 13.0 $\pm$ 3.0  | 15.89 $\pm$ 5.84  | 9.4 $\pm$ 2.5   | 32.9 $\pm$ 0.9 | 17.9 $\pm$ 4.9 | 17.4 $\pm$ 4.9 |
|           | <b>72 h</b> | 18.9 $\pm$ 3.8  | 33.57 $\pm$ 6.48  | 9.3 $\pm$ 3.9   | 46.6 $\pm$ 2.3 | 16.1 $\pm$ 2.6 | 14.8 $\pm$ 1.2 |
| <b>10</b> | <b>48 h</b> | 20.6 $\pm$ 5.5  | 50.76 $\pm$ 0.28  | 11.1 $\pm$ 2.9  | 89.3 $\pm$ 0.7 | 2.2 $\pm$ 2.6  | 51.1 $\pm$ 3.3 |
|           | <b>72 h</b> | 19.6 $\pm$ 3.1  | 66.78 $\pm$ 2.36  | 11.9 $\pm$ 0.7  | 97.2 $\pm$ 0.2 | -2.2 $\pm$ 3.8 | 54.4 $\pm$ 3.6 |
| <b>11</b> | <b>48 h</b> | 22.4 $\pm$ 12.3 | 43.84 $\pm$ 11.02 | 30.8 $\pm$ 5.0  | 27.4 $\pm$ 1.8 | 24.2 $\pm$ 4.9 | 38.2 $\pm$ 6.5 |
|           | <b>72 h</b> | 29.3 $\pm$ 15.4 | 65.02 $\pm$ 11.60 | 27.8 $\pm$ 5.5  | 67.5 $\pm$ 4.1 | 26.3 $\pm$ 1.7 | 54.6 $\pm$ 9.2 |
| <b>12</b> | <b>48 h</b> | 12.2 $\pm$ 1.7  | 45.50 $\pm$ 1.71  | 13.5 $\pm$ 0.2  | 39.7 $\pm$ 2.7 | 7.3 $\pm$ 2.1  | 26.6 $\pm$ 5.3 |
|           | <b>72 h</b> | 14.9 $\pm$ 1.8  | 58.26 $\pm$ 1.08  | 8.5 $\pm$ 4.2   | 46.6 $\pm$ 4.5 | 13.2 $\pm$ 7.9 | 28.4 $\pm$ 8.5 |

**Table S4. RT-qPCR primers sequences (5' - 3').**

| GENE          | Sens    | Primer sequence                     | Temp.<br>(°C) |
|---------------|---------|-------------------------------------|---------------|
| <i>UBB</i>    | Forward | 5' – GCTTTGTTGGGTGAGCTTGT – 3'      | 60°C          |
|               | Reverse | 5' – CGAAGATCTGCATTTTGACCT – 3'     |               |
| <i>TBP</i>    | Forward | 5' – GAGCTGTGATGTGAAGTTTCC – 3'     | 60°C          |
|               | Reverse | 5' - TCTGGGTTTGATCATTCTGTAG - 3'    |               |
| <i>RPL13A</i> | Forward | 5' - GTTCCTGCTCTCAAG – 3'           | 58°C          |
|               | Reverse | 5' – GTCACCTGCCTGGTACTTCC - 3'      |               |
| <i>kRAS</i>   | Forward | 5' – TCTTGCCTCCCTACCTTCCACAT - 3'   | 61°C          |
|               | Reverse | 5' – CTGTCAGATTCTCTTGAGCCCTG - 3'   |               |
| <i>cMYC</i>   | Forward | 5' -GGCTCCTGGCAAAAGGTCA - 3'        | 61°C          |
|               | Reverse | 5' – CTGCGTAGTTGTGCTGATGT - 3'      |               |
| <i>BCL2</i>   | Forward | 5' – GTCATGTGTGTGGAGAGCGTCAACC - 3' | 60°C          |
|               | Reverse | 5' – CCAGGGCCAACTGAGCAGAGTC - 3'    |               |
| <i>RET</i>    | Forward | 5' – GCAGCATTGTTGGGGGACA - 3'       | 61°C          |
|               | Reverse | 5' - CACCGGAAGAGGAGTAGCTG - 3'      |               |
